## **Robotic selection for the rapid development of stable CHO cell lines for HIV vaccine for production**

**Short Title:** Rapid development of CHO cell lines for vaccine production.

Sara M O'Rourke<sup>1</sup>, Gabriel Byrne<sup>1</sup>, Gwen Tatsuno<sup>1</sup>, Meredith Wright<sup>1</sup>, Bin Yu<sup>1</sup>, Kathryn A Mesa<sup>1</sup>, Rachel C Doran<sup>1</sup>, David Alexander<sup>1</sup>, Phillip W Berman<sup>1</sup>

<sup>1</sup>Department of Biomolecular Engineering, The University of California at Santa Cruz, Santa Cruz, CA

**Correspondence:** Phillip W Berman, Department of Biomolecular Engineering, Baskin School of Engineering, The University of Santa California at Santa Cruz, 1156 High St., Mail Stop-SOE2, Santa Cruz, Santa Cruz, CA

**E-mail:** [pwb@soe.ucsc.edu](mailto:pwb@soe.ucsc.edu)

**Keywords:** HIV vaccine, rgp120, carbohydrate, gene editing, CHO cells, antibodies, neutralization, robotic selection

## 1 **Abstract**

2 The production of envelope glycoproteins (Envs) for use as HIV vaccines is challenging.  
3 The yield of Envs expressed in stable Chinese Hamster Ovary (CHO) cell lines is  
4 typically 10-100 fold lower than other glycoproteins of pharmaceutical interest.  
5 Moreover, Envs produced in CHO cells are typically enriched for sialic acid containing  
6 glycans compared to virus associated Envs that possess mainly high-mannose  
7 carbohydrates. This difference alters the net charge and biophysical properties of Envs  
8 and impacts their antigenic structure. Here we employ a novel gene-edited CHO cell  
9 line (MGAT1<sup>-</sup> CHO) to address the problems of low expression, high sialic acid content,  
10 and poor antigenic structure. We demonstrate that stable cell lines expressing high  
11 levels of gp120, potentially suitable for biopharmaceutical production can be created  
12 using the MGAT1<sup>-</sup> CHO cell line. We also show that the efficiency of this process can be  
13 greatly improved with robotic selection. Finally, we describe a MGAT1<sup>-</sup> CHO cell line  
14 expressing A244-rgp120 that exhibits improved binding of three major families of bN-  
15 mAbs compared to Envs produced in normal CHO cells. The new strategy described  
16 has the potential to eliminate the bottleneck in HIV vaccine development that has limited  
17 the field for more than 25 years.

18

## 19 **1 Introduction**

20           The development of a safe, effective, and affordable HIV vaccine is a global  
21 public health priority. After more than 30 years of HIV research, a vaccine with these  
22 properties has yet to be described. To date, the only clinical study to show that  
23 vaccination can prevent HIV infection is the 16,000-person RV144 trial carried out in  
24 Thailand between 2003 and 2009 (1). This study involved immunization with a  
25 recombinant canarypox virus vector to induce cellular immunity (2-4) and a bivalent  
26 recombinant gp120 vaccine designed to elicit protective antibody responses (5-7).  
27 Although statistically significant, the protective efficacy of this vaccination regimen was  
28 low (31.2%,  $P=0.04$ ). Several correlates of protection studies suggested that the  
29 protection observed was primarily due to antibodies to rgp120 (8-10). Thus, there is  
30 considerable interest in finding ways to improve the level of protection that can be  
31 achieved with rgp120 vaccine regimens. Improving an existing vaccine such as RV144,  
32 with an established record of safety, would be faster and more cost-effective than  
33 developing a new vaccine concept from scratch. A roadmap to improve the rgp120  
34 vaccine used in the RV144 trial has been provided by the recent studies of broadly  
35 neutralizing monoclonal antibodies (bN-mAbs) to gp120 as well as studies of the  
36 carbohydrate content of virion associated Env proteins. Beginning in 2009, studies of  
37 bN-mAbs isolated from HIV infected subjects revealed that many recognized unusual  
38 glycan dependent epitopes requiring high-mannose glycans that are early intermediates  
39 in the N-linked glycosylation pathway (11-20). Passive transfer studies reviewed by  
40 Stephenson & Barouch (21) confirmed that these bN-mAbs could protect animals from  
41 infection by SHIV viruses (22-27) and lower virus loads in HIV infected individuals (28,

42 29). Multiple studies have now demonstrated that the carbohydrate present on virion  
43 associated envelope glycoprotein, representing approximately 50% of its molecular  
44 weight, is enriched for simple, high-mannose forms of N-linked carbohydrates rather  
45 than the complex, sialic acid containing glycans found on most membrane bound and  
46 secreted glycoproteins (20, 30-32). Since the rgp120 vaccine used in the RV144 study  
47 and other clinical trials (33-35) was enriched for complex glycans (36), they lacked  
48 multiple epitopes targeted by the high-mannose specific bN-mAbs. Thus the possibility  
49 exists that rgp120s such as A244-rgp120 used in the RV144 trial, produced with the  
50 glycans required to bind bN-mAbs, might be more effective in eliciting a protective  
51 immune response than the previous rgp120 vaccines. To test this hypothesis in human  
52 clinical trials, a practical way to produce large quantities of Env proteins possessing the  
53 high-mannose glycans is required.

54 The production of recombinant HIV envelope proteins (rgp120 and rgp140) for  
55 clinical research and commercial deployment has historically been challenging. Not only  
56 is it labor intensive to isolate stable cell lines producing commercially acceptable yields  
57 (e.g. >50 mg/mL) but it is also difficult to consistently manufacture a high quality, well  
58 defined product with uniform glycosylation. Replacement of the native envelope signal  
59 sequence (37, 38) and codon optimization (39) improved yields, but generating stable  
60 CHO cell lines suitable for vaccine production remained difficult. Consequently, the  
61 antigens used in the RV144 trials manufactured more than 20 years ago are still being  
62 used in multiple clinical trials (40-44).

63 Recombinant gp120 typically possesses 25 or more potential N-linked  
64 glycosylation sites making up more than 50% of the protein's mass (7, 45). Each

65 glycosylation site can possess as many as 4 sialic acid residues, with up to as 79  
66 different glycoforms (46) possible at a single site, resulting in enormous heterogeneity in  
67 net charge and biophysical properties. This variability makes it hard to purify and define  
68 the precise chemical structure of the recombinant protein. As pharmacokinetic and  
69 pharmacodynamic properties of glycoproteins are in large part determined by the sialic  
70 acid content, glycan heterogeneity represents a major source of product variability (47).  
71

## 72 **2 Results**

73       Efforts to produce HIV Env proteins for clinical testing have been complicated by  
74 problems of poor expression, heterogeneity in N-linked glycosylation and net charge,  
75 and low yields from downstream purification (36, 46, 48-56). To address these problems  
76 we combined a high efficiency electroporation device (MaxCyte STX, MaxCyte Inc.,  
77 Gaithersburg, MD), a robotic cell selection system, ClonePix2 (Molecular Devices,  
78 Sunnyvale, CA) and a novel cell line (MGAT1<sup>-</sup> CHO 3.4F10) that was recently  
79 developed in our lab (57). The MGAT1<sup>-</sup> CHO cell line has a mutation in the Mannosyl  
80 (Alpha-1,3-)-Glycoprotein Beta-1,2-N-Acetylglucosaminyl-transferase gene (MGAT1)  
81 introduced by CRISPR/Cas9 gene editing. Recombinant gp120 produced by transient  
82 transfection in MGAT1<sup>-</sup> CHO exhibited enhanced binding to three major families of  
83 glycan dependent bN-mAbs (PG9, PGT128, and PGT121/10-1074) compared to  
84 rgp120s produced in normal CHO or 293 cell lines. To explore the utility of MGAT1<sup>-</sup>  
85 CHO cells as a cellular substrate for biopharmaceutical manufacturing of HIV vaccines,  
86 we attempted to create a stable MGAT1<sup>-</sup> CHO cell line expressing a variant of the  
87 A244-rgp120 envelope protein that was used in the RV144 HIV-1 vaccine trial (1). This

88 variant, A244\_N332-rgp120, differed from the A244-rgp120 immunogen in that a single  
89 N-linked glycosylation site was moved from N334 to N332 (58).

## 90 **2.1 Replacement of chemical transfection with electroporation.**

91 Estimating that the frequency of cells expressing high levels of rgp120 might be  
92 in the range of one in  $10^{-4}$  (59-61), we calculated that we needed to screen 10- 100  
93 thousand transfectants. To optimize transfection efficiency, we replaced cationic lipid  
94 transfection that we had previously used to transiently produce rgp120's (36, 57, 58, 62)  
95 with electroporation. Use of the MaxCyte STX system resulted in reproducible  
96 transfections with efficiencies typically greater than 80% in CHO-S or MGAT1- CHO  
97 cells when GFP expression was quantified by flow cytometry, and viabilities greater  
98 than 95% measured by trypan-blue exclusion (Fig. 1). Based on these results, MGAT1-  
99 CHO cells were electroporated with a plasmid designed for the expression of A244-  
100 N332-rgp120, and the aminoglycoside 3'-phosphotransferase gene that confers  
101 resistance to selectable marker, G418.

## 102 **2.2 Selection of stable MGAT1- CHO cell lines expressing A244\_N332-rgp120** 103 **envelope proteins**

104 We used the ClonePix2 cell screening and selection robot to identify and select  
105 the comparatively few transfectants secreting high levels of rgp120. In this system, high  
106 producing cell colonies are visualized by the formation of a "halo" or immunoprecipitin  
107 band formed by fluorescently labeled antibodies suspended in a semi-solid,  
108 methylcellulose containing, cell culture matrix. After electroporation, cells were  
109 suspended in a semisolid matrix containing the selectable marker G418 and antibodies  
110 to rgp120 labeled with the Alexa 488 fluorophore. After six days, distinct colonies were

111 visible. By sixteen days, 45,000 colonies dispersed among 8 six-well cell culture plates  
112 had grown sufficiently for robotic screening and selection (Fig. 2A). When viewed under  
113 fluorescent light (Fig. 2B), a small fraction of the cells exhibited halos resulting from  
114 antibody-antigen precipitin bands that formed around the colonies secreting high levels  
115 of rgp120. The top 0.1% (44) of colonies selected based upon morphology and halo  
116 intensity were picked by the robot and expanded for further analysis (Fig. 2C). Selected  
117 colonies were subsequently screened by ELISA for the ability of secreted rgp120 to bind  
118 polyclonal antibodies, and the prototypic, glycan dependent bN-mAb PG9. PG9  
119 recognizes an epitope in the V1/V2 domain and requires Man5 at position N160 for  
120 binding (18). Based on the ELISA results, cells from the top 25 rgp120 producing  
121 colonies were transferred to 24 well plates and screened by ELISA and immunoblot.  
122 The best 15 lines were then expanded into 125 mL cultures for quantitative protein  
123 expression assay under the same expression conditions used for transient expression  
124 i.e. CD-CHO opt-CHO supplemented with glucose, glutamine, CHO- Feed A and  
125 yeastolate. Six of these cultures were expanded for growth in 1.6 L shake flask cultures.  
126 Immunoblot analysis (Fig. 3A) revealed that rgp120 made by the 6 MGAT1- CHO  
127 colonies were smaller in size (85 kDa) compared to A244-rgp120 produced in normal  
128 DG44 CHO cells (120 kDa). Comparison of reduced and non-reduced proteins detected  
129 a trace amount of aggregated rgp120 protein and no proteolytic degradation (clipping).  
130 Cultures were harvested when cell viability dropped to 50%. When culture supernatant  
131 was assayed by ELISA (Fig. 3B) rgp120 titers of approximately 400 mg/L were  
132 observed in in two cell lines (5D and 5F) with the 5C line exhibiting the lowest rgp120  
133 titer (approximately 125 mg/L). Examining the kinetics of cell growth and rgp120

134 accumulation in cell culture medium (Fig. 3C), we found that rgp120 production  
135 increased after the addition of sodium butyrate at day six with the rate of accumulation  
136 stabilizing between 10-14 days of cell culture. During this period, rgp120 became the  
137 major protein secreted into the cell culture medium.

### 138 **2.3 Growth characteristics of MGAT1<sup>-</sup> CHO cells expressing A244\_N332-rgp120**

139 Several experiments were performed to characterize the growth characteristics of  
140 MGAT1<sup>-</sup> CHO cells expressing A244\_N332-rgp120. The initial 125-500mg/L yield, was  
141 obtained using culture conditions primarily designed for transient expression of  
142 recombinant proteins following electroporation. Data is shown in Figure 4A-C from  
143 triplicate cultures of 5F MGAT1<sup>-</sup> CHO (600 mL cultures grown in 1.6 L shake flasks) for  
144 a 13-day culture period. Cells were grown at 37°C until they reached late log growth  
145 phase (six days) then sodium butyrate was added to enhance protein expression and  
146 the temperature was shifted to 32°C for the remainder of the experiment (Fig. 4A). The  
147 cell viability ranged from 90-100% for the first 8 days of culture and then steadily  
148 declined. In contrast the cumulative amount of rgp120 in the cell culture medium  
149 continued to accumulate over the entire 13-day culture (Fig. 4C) reaching a maximum of  
150 800 mg/L by harvest. Figure 4 panels D-F show a similar batch fed experiment to test  
151 the effect of different feed additives on protein production by the 5F MGAT1<sup>-</sup> CHO line.  
152 Five (duplicate) batch fed culture of the 5F MGAT1<sup>-</sup> CHO isolate were grown in shake  
153 flasks in balanced CHO-Growth A (Irvine Scientific, Santa Ana, CA) media  
154 supplemented with CHO Feed C, glucose, glutamine and one of each of a panel of  
155 peptone hydrolysates; yeastolate, cottonseed, pea, wheat or CD-hydrolysate, which  
156 support protein expression in CHO cells, reviewed in (63). The cells were again grown



157 at 37°C until they reached late log growth phase (six days) with a viable cell density  
158 approaching  $1 \times 10^7$  cells per ml, adding Sodium butyrate (1mM) and shifting the  
159 temperature 32°C for the remainder of the experiment (Fig. 4D). There were small  
160 differences in cell growth and viability (Fig. 4D and 4F) and productivity with the different  
161 peptone hydrolysate additives which might be further explored prior to large scale  
162 production, however, all supported 1g/L production of rgp120 at harvest (Fig. 4F).  
163 These studies demonstrate that the 5F MGAT1<sup>-</sup> CHO cell line expressing A244\_N332-  
164 rgp120 can be grown to high cell densities and is productive for up to 12-14 days in  
165 culture. It is likely that media optimization and a regulated bioreactor system can  
166 improve cell viability, cell densities, and rgp120 expression

#### 167 **2.4 Sensitivity of A244-N322-rgp120 to digestion by Peptide-N-Glycosidase F and** 168 **Endoglycosidase H**

169 Recombinant gp120 produced in the 5F MGAT1<sup>-</sup> CHO cell line exhibited an  
170 apparent molecular weight (MW) of (85 kDa). The same protein produced in CHO-S  
171 cells, exhibited an apparent molecular weight of 120 kDa (Fig. 3A). This difference in  
172 size would be expected if the glycans present in the protein produced in the MGAT1<sup>-</sup>  
173 CHO cell line were limited to Mannose -5 (Man5) or earlier intermediates in the N-linked  
174 glycosylation pathway, and the glycans present in the protein produced in the CHO-S  
175 cells consisted of the normal sialic acid containing complex carbohydrates. To test this  
176 hypothesis, the proteins were digested with endoglycosidase H (EndoH) or Peptide-N-  
177 Glycosidase F (PNGase F) (Fig. 5). EndoH selectively cleaves within the chitobiose  
178 core of high-mannose and some hybrid oligosaccharides and thus cleaves the simple,  
179 high mannose forms, of N-linked glycans but not the mature sialic acid containing N-

180 linked glycans. In contrast, PNGase F cleaves between the innermost N-  
181 acetylglucosamine and asparagine residues of high mannose, hybrid, and complex  
182 oligosaccharides and is able to digest both simple and complex N-linked glycans. We  
183 observed that PNGase F treatment converted the proteins produced in both the  
184 MGAT1<sup>-</sup> CHO and CHO-S cells to a common molecular weight of approximately 56  
185 kDa. This result confirmed that the difference in molecular weight between the proteins  
186 produced in the MGAT1<sup>-</sup> CHO cell line and the CHO-S cell line could be attributed to  
187 differences in the type of glycosylation and that approximately 50% of the mass of  
188 rgp120 is carbohydrate. When the sensitivity to EndoH was measured, we found the  
189 rgp120 produced in the MGAT1<sup>-</sup> cells was mostly sensitive to digestion by EndoH,  
190 whereas the rgp120 produced in the CHO-S cells was resistant to EndoH digestion.  
191 This result confirmed that rgp120 produced in MGAT1<sup>-</sup> CHO cells is derivatized  
192 primarily with simple, high mannose glycans whereas the protein produced in CHO-S  
193 cells is derivatized primarily with the complex, mature form of N-linked glycosylation.

#### 194 **2.5 Binding of A244\_N332-rgp120 by bN-mAbs**

195 The functional differences in the antigenic structures of A244\_N332-rgp120 produced in  
196 the MGAT1<sup>-</sup> CHO cells and A244 rgp120 produced in normal CHO-S cells was  
197 measured in a series of antibody binding experiments (Fig. 6). For these studies, the  
198 binding of bN-mAbs to rgp120s expressed in a stable MGAT1<sup>-</sup> CHO cell line (5F  
199 MGAT1<sup>-</sup> CHO) was compared to bN-mAb binding to the same protein expressed by  
200 transient transfection in MGAT1<sup>-</sup> CHO cells, and the A244 rgp120 protein transiently  
201 expressed in CHO-S cells. In this regard, the protein expressed in CHO-S cells closely  
202 resembled the A244-rgp120 protein used in the RV144 clinical trial. The panel of bN-

203 mAbs included both glycan dependent bN-mAbs PG9, PGT121/101074, and PGT128  
204 (17, 18) as well as the CD4 supersite site VRC01 antibody (64, 65).

205 For purposes of comparison, rgp120 binding to the virus entry inhibitor CD4-IgG  
206 served as a positive control. We first examined rgp120 binding by the prototypic glycan  
207 dependent bNAbs PG9, that binds the core mannose residues of two glycans at position  
208 N160 and either N156 or N173 within the V1V2 domain (18). The glycan at N160 was  
209 initially identified as Man5 in the context of a V1V2 scaffold structure (66) but recent  
210 reports suggest that PG9 is more tolerant of heterogeneity than initially thought (14, 67).  
211 Consistent with the hypothesis that a complex glycan at position N160 might interfere  
212 with PG9 binding, glycan mapping of CHO-S produced monomeric rgp120 revealed  
213 complex glycans at positions N156 and N160 (68, 69). We observe a quantitative  
214 difference (Fig. 6A) between the binding affinity of rgp120 A224-N332 produced in  
215 MGAT1<sup>-</sup> CHO cells as measured by EC<sub>50</sub> (1.33 nM) for PG9, when compared to the  
216 RV144 antigen, rgp120 A224, produced in CHO S cells (no binding plateau). This result  
217 is in concordance with data from previous transient transfection studies (57, 58).  
218 Binding of bN-mAbs to protein produced in the 5F MGAT1<sup>-</sup> CHO cell line was  
219 indistinguishable to protein produced by transient transfection in MGAT1<sup>-</sup> CHO cells.

220 We examined rgp120 binding to four bN-mAbs from two different families that are  
221 known to recognize glycan dependent epitopes in the stem of the V3 domain. PGT126  
222 and PGT128 bN-mAbs are both members of the PGT128 family, and were derived from  
223 a common ancestral immunoglobulin VH gene (17). The bN-mAb 10-1074 is a member  
224 of the PGT121 family, and both antibodies were derived from a common ancestral  
225 immunoglobulin VH region gene distinct from the PGT128 family (13, 17). We observed

226 significantly improved binding to members of the PGT128 family to MGAT1<sup>-</sup> CHO-S  
227 produced A244\_N332 rgp120 compared to the CHO-S A244 protein; however the  
228 magnitude of the difference was much greater for PGT126 compared to PGT128 (Fig.  
229 6B and 6C). Improved PGT128 family binding is consistent with enrichment of N332  
230 with Man5-9 glycans as PGT126/128 epitopes bind core residues of high mannose at  
231 positions N301 and N332, or N295 and N334 ( 15, 17, 19, 20). Mass spectroscopy of  
232 virion-derived gp120 has shown that asparagine at position 332 is occupied by Man5-9  
233 glycans with Man8-9 dominating (32). However on CHO-S derived rgp120, high  
234 mannose is dominant but not exclusive (68, 69). Our binding data suggests that the  
235 PGT126 epitope is more sensitive to occlusion by proximal processed glycans than  
236 PGT128.

237         Members of the PGT121 family (PGT121 and 10-10-74) differed considerably in  
238 their ability to bind MGAT1<sup>-</sup> A244\_N332 and CHO-S A244 rgp120 (Fig. 5D and 5E).  
239 PGT121 is different from all of the other glycan dependent bN-mAbs tested in that it  
240 accommodates either a sialylated or high mannose glycan at positions N332 or N334,  
241 and a sialylated glycan at position N137, whereas 10-1074 is N332 high-mannose  
242 restricted (13, 17). We observed significantly improved binding of 10-1074 to  
243 A244\_N332 rgp120 produced in the MGAT1<sup>-</sup> CHO cell line, and poor binding of  
244 PGT121. PGT121 did not bind rgp120 made in CHO-S cells. In control experiments, we  
245 found that all of the proteins tested bound to VRC01 bN-mAb. We noted a small but  
246 consistent higher maximal binding of VRC01 to proteins produced in the MGAT1<sup>-</sup> CHO  
247 cell line compared to the CHO-S cell line (Fig. 6F). This difference was also previously  
248 reported (57). VRC01 is an anti-CD4 binding site antibody with low affinity for glycan in

249 glycan-array assay (65). Glycans N197, N276 and N262 or N263 overlap with the  
250 binding site, and an N276 mannose core IVRC01 light chain contact was recently  
251 identified by (70). All proteins tested bound comparably to CD4-IgG regardless of the  
252 expression system (Fig. 6G), indicating that the CD4 binding site was properly folded  
253 and that the concentrations of the individual proteins were identical. Similarly, all of the  
254 Env proteins captured with the 34.1 Mab used in this experiment, bound comparably to  
255 the PB94 polyclonal rabbit sera (Fig. 6H). Thus, there was no significant difference in  
256 the concentration or coating efficiencies of the proteins used for the binding studies.

## 257 **2.6 Pathogen testing**

258 In order for the 5F MGAT1<sup>-</sup> CHO cell line to be considered as a substrate for  
259 vaccine production by current Good Manufacturing Processes (cGMP), it needs to be  
260 free of contamination by other cell lines and adventitious agents. To obtain data  
261 supporting these criteria, cells from the 5F MGAT1<sup>-</sup> CHO cell line were screened for  
262 contamination by a commercial testing laboratory (IDEXX, Inc., Columbia, MO). This  
263 analysis used validated PCR based techniques to screen for contamination by cells from  
264 multiple other species (human, mouse) and for contamination by a large number of  
265 human and animal pathogens including mycoplasma and minute virus of mice (MVM).  
266 No cellular, viral, or microbial contamination of the original research cell bank was  
267 detected (Supplemental Tables 1 and 2).

## 268 **2.7 Outline of new process for the development of a stable MGAT1<sup>-</sup> CHO cell line** 269 **expressing HIV-1 rgp120**

270 Based on our results we were able to devise a new standardized cell line  
271 production strategy for creating stable CHO cell lines expressing rgp120 and other Env

272 proteins in a timeline of 8-10 weeks. An outline for this new cell line development  
273 process including the experimental timeline for electroporation, colony selection, and  
274 protein expression/ purification is shown in Figure 7. The use of high efficiency  
275 electroporation, robotic screening, and the elimination of gene amplification strategies  
276 all contribute to a major reduction in the time and cost of producing stable CHO cell  
277 lines.

278

### 279 **3 Discussion**

280 In this study we describe the development of a new robotic cell line screening  
281 and selection strategy for the rapid production of stable, high yielding CHO cell lines  
282 suitable for the production of HIV vaccines. We also demonstrate that this strategy can  
283 be successfully employed using the recently described MGAT1<sup>-</sup> CHO cell line (MGAT1<sup>-</sup>  
284 CHO 3.4F10) that limits glycosylation primarily to Man5 glycans and, to date, has only  
285 been used for transient transfection experiments (57). Finally, we describe a MGAT1<sup>-</sup>  
286 CHO cell line (5F MGAT1<sup>-</sup> CHO) that produces high levels of a variant of gp120 from  
287 the A244 isolate of HIV-1. A244-rgp120 was a key component in the AIDSVAX B/E  
288 vaccine (5, 6) used in the RV144 clinical trial. The Env protein (A244\_N332-rgp120)  
289 produced by the 5F MGAT1<sup>-</sup> CHO cell line differs from the A244-rgp120 used in the  
290 RV144 trial in the location of a single N-linked glycosylation site (N332 compared to  
291 N334) and that it incorporates primarily Man5 glycans. These changes enable the  
292 A244\_N332 Env protein to bind bN-mAbs from three major families of bN-mAbs (PG9,  
293 PGT128, and PGT121/10-1074) that did not bind to the original vaccine immunogen.  
294 The addition of these glycan dependent epitopes represents a significant improvement

295 in the antigenic structure of A244-rgp120 and might improve the level of efficacy that  
296 can be obtained from an RV144-like immunization regimen.

297 Prior to the development of the MGAT1<sup>-</sup> CHO 3.4F10 cell line there was no  
298 practical means by which recombinant Env proteins enriched for high mannose glycans  
299 could be produced at large scale for HIV vaccine production. In these studies, we  
300 demonstrated that CHO cell lines expressing up to 1g/L of rgp120 that are potential  
301 candidates for vaccine antigen production, can be produced within 2-3 months. In  
302 contrast, the CHO cell line used to produce A244-rgp120 used in the RV144 trial  
303 produced only 20 mg/L and took more than 18 months to develop (Berman, P.W.,  
304 personal communication).

305 Previous studies have shown that early intermediates in the N-linked  
306 glycosylation pathway (Man5 or Man9) are essential components of many epitopes  
307 recognized by bN-mAbs (11-16, 18, 19, 20). Additionally, we now know that HIV virion-  
308 associated Env proteins are enriched for these early intermediates in the glycosylation  
309 pathway (20, 31, 50, 71). The A244\_N332-rgp120 protein produced in the 5F MGAT1<sup>-</sup>  
310 CHO cell line possesses multiple glycan dependent epitopes recognized by bN-mAbs  
311 and appears to possess a glycan structure that more closely resembles authentic HIV  
312 Env proteins compared to Env proteins produced in normal CHO cells. We hypothesize  
313 that this “glycan optimized” immunogen produced in the 5F MGAT1<sup>-</sup> CHO cell line  
314 might increase the potential level of protection documented in the RV144 trial from  
315 31.2% (P=0.04) to the efficacy level of 50% or more thought to be required for  
316 regulatory approval and clinical deployment (72).

317           These studies demonstrate that the MGAT1<sup>-</sup> CHO cell line is a suitable substrate  
318 for stable cell line development (57). The 5F MGAT1<sup>-</sup> CHO line can be grown at high  
319 densities ( $2 \times 10^7$  cells/mL) in serum free media for the length of time (8-10 days)  
320 consistent with modern manufacturing methods intended for the production of HIV  
321 vaccine immunogens. The success in cell line isolation was greatly enhanced by the  
322 use of robotic selection. The MaxCyte STX electroporation system achieved  
323 transfection efficiencies of greater than 80% with linearized plasmid. Another key step  
324 in the robotic screening strategy was the need to develop an imaging reagent that  
325 formed “halos” around rgp120 transfected cells. We found that the best “halos” resulting  
326 from the formation of immune-precipitin bands in semi-solid methylcellulose media were  
327 only obtained with fluorescently labeled polyclonal antibodies. Although previous  
328 anecdotal reports suggested that mixtures of fluorescently labeled monoclonal  
329 antibodies could form the immune-precipitin bands required for robotic selection, we  
330 were unable to confirm these reports. Finally, we attempted to see if the robotic  
331 selection could overcome the need for time-consuming gene amplification experiments  
332 (via methotrexate or methionine sulphoximine), and we found that directly screening  
333 approximately 40,000 clones in a single ClonePix2 experiment was adequate to isolate  
334 a cell line that produced approximately 1g/L of rgp120 with no gene amplification.  
335 Studies are in progress to determine whether the high expression levels found in this  
336 study results from the selection of cell lines with high levels of amplified genes or from  
337 integration of the HIV transgene into transcriptionally active regions of chromatin.

338           The new technology outlined here should allow for the rapid production and  
339 testing of multiple new Env based vaccine concepts that have not previously been



340 tested for lack of a fast and cost effective manufacturing process. Such concepts  
341 include multivalent rgp120 vaccines (73), guided immunization vaccine strategies (73-  
342 77), and Env proteins optimized for the binding of inferred ancestral forms of bN-mAbs  
343 (78-80). In summary, by combining recent developments in transfection technology,  
344 robotic selection, and gene editing, we have developed a novel method for the  
345 production of recombinant Env proteins has the potential to improve the potency,  
346 shorten the time, and lower the cost of HIV vaccine production. These improvements  
347 provide the means to break the bottleneck in HIV vaccine manufacturing that has limited  
348 the field for the last 20 years (81).

349

## 350 **4 Materials and methods**

### 351 **4.1 Cells and antibodies**

352 The suspension adapted, stable MGAT1<sup>-</sup> CHO cell line was created by targeted  
353 inactivation of the gene encoding the enzyme, Mannosyl (Alpha-1,3-)-Glycoprotein  
354 Beta-1,2-N-Acetylglucosaminyl-transferase in CHO cells using CRISPR/Cas9 gene  
355 editing (57). Suspension adapted CHO-S cells were obtained from Thermo Fisher  
356 (Thermo Fisher, Life Technologies, Carlsbad, CA). GnTI<sup>-</sup> 293 HEK cells were obtained  
357 from the American Tissue Type Collection (ATCC). Broadly neutralizing monoclonal  
358 antibodies (bN-mAbs), PG9, PGT121, PGT126, PGT128, VRC01, and 10-1074, were  
359 obtained from the NIH AIDS Reagent Program (Germantown, MD) or produced from  
360 published sequence data. The entry inhibitor CD4-IgG was identical to that described by  
361 Capon et al. (82). The 34.1 murine monoclonal antibody was developed in our  
362 laboratory (62) and is specific for a 27 amino acid sequence of Herpes Simplex Virus

363 Type 1 glycoprotein D (gD) that has been used previously as a purification tag (7, 38).  
364 Polyclonal antibodies were raised according to the guidelines of the Animal Welfare Act.  
365 The immunization protocol was reviewed and approved by the Animal Care and Use  
366 Committee of the Pocono Rabbit Farm and Laboratory (Pocono Laboratories and  
367 Rabbit Farm, Canadensis, PA). Polyclonal rabbit-serum (PB94) was obtained from  
368 rabbits immunized with a mixture of A244 and MN rgp120 as previously described (6).  
369 Polyclonal goat-serum was raised from goats immunized with a cocktail of purified  
370 rgp120s from three clades of HIV (CRF01\_AE, B, and C) produced in GnTI- 293 HEK  
371 cells. Rabbit and goat polyclonal anti-gp120 for use in immunoassays were purified by  
372 affinity chromatography using a HiTrap Protein G column (GE Healthcare, Little  
373 Chalfont, United Kingdom). Immunoaffinity purified anti-gp120 for use in the ClonePix2  
374 robot (Molecular Devices, Sunnyvale, CA) was isolated from goat sera by  
375 immunoaffinity chromatography using a column consisting of gp120 coupled to  
376 Sepharose 4B (GE Healthcare, Little Chalfont, United Kingdom). Immunoaffinity  
377 purification involved successive passage over rgp120 bound affinity columns which  
378 were then washed with 10 column volumes of 50 mM Tris, 0.5 M NaCl, 0.1 M TMAC  
379 (tetramethyl-ammonium chloride) buffer (pH 7.4). Bound antibody was eluted with 0.1 M  
380 sodium acetate buffer, pH 3.0, and the eluent neutralized by the addition of 1.0 M Tris  
381 (1:10 ratio). The purified antibody was adjusted to a final concentration of 1-2 mg/mL in  
382 PBS buffer as determined by bicinchoninic acid (BCA) and conjugated to Alexa 488  
383 (Thermo Fisher Scientific, Waltham, MA), before 0.1  $\mu$ M filtration.

#### 384 **4.2 Cell culture conditions**

385 MGAT1<sup>-</sup> and CHO-S cells were maintained in CD-CHO medium supplemented  
386 with 8 mM GlutaMAX, 0.1 mM Hypoxanthine, and 0.16 mM thymidine (HT) in shake  
387 flasks using a Kuhner ISF1-X shaker incubator (Kuhner, Birsfelden, Switzerland) at  
388 37°C, 8% CO<sub>2</sub>, and 125 rpm. Static cultures were maintained in 6, 24, and 96 well cell  
389 culture dishes (Greiner, Kremsmünster, Austria) and grown in a Sanyo incubator  
390 (Sanyo, Moriguchi, Osaka, Japan) at 37°C and 8% CO<sub>2</sub>. For protein production, CD-  
391 OPTI-CHO or CHO Balanced Growth A medium (Irvine, Santa Ana, CA) was  
392 supplemented with 2 mM GlutaMAX, HT and MaxCyte CHO A Feed which is comprised  
393 of 0.5% Yeastolate, BD, Franklin Lakes, NJ; 2.5% CHO-CD Efficient Feed A, 2 g/L  
394 Glucose (Sigma-Aldrich, St. Louis, MO) and 0.25 mM GlutaMAX). Cell culture media  
395 and additives were obtained from Thermo Fisher Life Technologies (Carlsbad, CA)  
396 unless otherwise stated. In preliminary batch fed cell culture experiments to optimize  
397 protein yield, we tested out an additional four peptone hydrolysates replacing yeastolate  
398 with; Proyield Cotton, Proyield Pea, Proyield Wheat (Friesland Campira, Delhi, NY) and  
399 CD-Hydrolysate (SAFC, Carlsbad, CA) and CHO-CD Feed efficient A with CHO- CD  
400 Efficient Feed C (Thermo Fisher Life Technologies, Carlsbad, CA).

#### 401 **4.3 Molecular cloning and sequencing**

402 Standard genetic engineering techniques were used to construct a G418  
403 selectable expression vector (UCSC1331) that encodes gp120 from the clade  
404 CRF01\_AE strain of HIV-1. The protein produced is identical in sequence to the A244-  
405 rgp120 protein used in the RV144 clinical trial with the exception that a single N-linked  
406 glycosylation site at N334 has been moved to position N332, described by Doran et al.  
407 (58), GenBank ref MG189369. The plasmid was similar to the commercially available

408 pCDNA3.1 vector with the exception that methylation targets at positions C41 and C179  
409 in the CMV promoter were deleted as described by Moritz and Gopfert (83). All  
410 sequencing was performed at the University of California Core Sequencing Facility  
411 (Berkeley, CA). pCI\_GFP, a gift from Dr. James Brady (MaxCyte), was transfected in  
412 parallel with the gp120 expression plasmid to monitor transfection efficiency. Plasmid  
413 DNA was prepared using the endotoxin free Qiagen Giga Prep purification kit (Qiagen,  
414 Hilden, Germany) and linearized by digestion with Pvu1 (New England Biolabs, Ipswich,  
415 MA) prior to electroporation.

#### 416 **4.4 Selection of stable MGAT1<sup>-</sup> CHO cell lines expressing A244-rgp120**

417       Electroporation of the UCSC1331 plasmid into MGAT1<sup>-</sup> CHO cells was  
418 performed using a MaxCyte scalable transfection system (STX, MaxCyte Inc.,  
419 Gaithersburg, MD) according to the manufacturer's instructions. Twenty-four hours after  
420 electroporation, cells were diluted to a concentration of 1000 or 5000 cells/mL in  
421 methylcellulose CHO-Growth A with L-glutamine (Molecular Devices, Sunnyvale, CA)  
422 containing 500 µg/mL of G418 and 10 µg/mL of Alexa 488 labeled immunoaffinity  
423 purified polyclonal goat anti-gp120 antibody. The plates were incubated at 37°C with 8%  
424 CO<sub>2</sub> and 85% humidity for 16 days, then colony selection was performed using a  
425 ClonePix2 robot (Molecular Devices, Sunnyvale, CA). Colonies were imaged under  
426 white and fluorescent light (470 nm excitation and 535 nm emission wavelength filter  
427 set). Both images were superimposed, and colonies selected according to mean  
428 exterior fluorescent intensity (84). The top ranking 0.1% of colonies were aspirated with  
429 micro-pins controlled by the ClonePix2 system and dispersed automatically in a 96-well  
430 plate containing CHO Growth A medium (Genetix Molecular Devices, Sunnyvale, CA)

431 supplemented with HT, 8 mM GlutaMAX, and 500 µg/ml G418, and cultured at 37°C,  
432 with 8% CO<sub>2</sub> and 85% humidity. After 9 days in culture, protein production was assayed  
433 by ELISA, and positive colonies transferred to 2 mL wells and shake flasks when cell  
434 mass permitted transfer. Six lines were cultured for protein production (Section 2.2) at a  
435 volume of 600 mL in 1.6 L shake flasks (Thompson, Oceanside, CA)

#### 436 **4.5 Protein quantification**

437 Protein concentration was determined by capture ELISA (62). Purified protein  
438 and cell culture supernatant were analyzed on 4-12% Bis-Tris PAGE SDS gels in either  
439 MES or MOPS gel running buffer (Thermo Scientific, Waltham, MA). For Immunoblot,  
440 proteins were electrophoresed on a 4-12% NuPage PAGE SDS gel in MES running-  
441 buffer, transferred to a PDVF membrane, then probed with a polyclonal rabbit anti-  
442 rgp120 antibody (PB94) and an affinity purified secondary HRP conjugated goat anti-  
443 rabbit H+L chain antibody (Jackson ImmunoResearch, West Grove, PA) and visualized  
444 using an Innotech FluoChem2 system (Genetic Technologies Grover, MO).

#### 445 **4.6 Affinity purification of A244\_N332-rgp120**

446 Recombinant proteins were immunoaffinity purified from cell culture media using  
447 the gD purification tag as previously described (36) and protein concentrations  
448 determined using bicinchoninic assay (BCA).

#### 449 **4.7 Binding of bN-mAbs**

450 The binding to bN-mAbs to purified rgp120s from the MGAT1<sup>-</sup> CHO and CHO-S lines  
451 was assayed with a capture Fluorescence Immunoassay (FIA) as described previously  
452 (58). Briefly, Fluotrac high binding 96 well plates (Griener Bio-One Kremsmünster,  
453 Austria) were coated with 2µg/ml 34.1 Mab overnight in PBS, then blocked with

454 1%BSA/PBS 0.05% tween for 2 hours. Purified rgp120 was captured at 6ug/ml  
455 overnight at 4<sup>0</sup>C. Three-fold serial dilutions of antibody, entry inhibitor or isotype control  
456 were added to each well followed by Alexa 488 labelled polyclonal anti-species antibody  
457 (Jackson ImmunoResearch, West Grove PA). Incubations were performed for 90 min at  
458 room temperature followed by a 4x wash in PBS 0.05% tween buffer unless otherwise  
459 noted. Absorbance was read using an EnVision Multilabel Plate Reader (PerkinElmer,  
460 Inc Waltham, MA) using a FITC 353 emission filter and FITC 485 excitation  
461 filter. Assays were performed in triplicate. EC50 was calculated from a plot of log  
462 (agonist) vs response –variable slope (four parameters) on Graph Pad Prism 6 for Mac.,  
463 GraphPad Software, La Jolla, CA.

464 Binding assays were carried out in triplicate.

#### 465 **4.8 Enzymatic digestion of carbohydrate**

466 Enzymatic digestion of rgp120 was performed as described by Yu et al (36). For  
467 molecular mass analysis post digestion, 2 µg of each protein was electrophoresed on a  
468 4-12% Bis-Tris PAGE SDS gel in MOPS running buffer, and stained with Coomassie  
469 Simply Blue (Thermo Scientific, Waltham, MA).

470

471

#### 472 **Acknowledgements**

473 This research was supported by NIH grant RO1AI113893. We wish to thank Chelsea  
474 Didinger for expert assistance in the preparation of this manuscript. We also wish to  
475 thank Bari Holm Nazari for assistance with flow cytometry.

#### 476 **References**

- 477  
478 1. Rerks-Ngarm S, Pitisuttithum P, Nitayaphan S, Kaewkungwal J, Chiu J, Paris R, et al.  
479 Vaccination with ALVAC and AIDSVAX to prevent HIV-1 infection in Thailand. *N Engl J Med.*  
480 2009;361(23):2209-20.  
481 2. Excler J, Plotkin S. The prime-boost concept applied to HIV preventive vaccines.  
482 *AIDS (London, England).* 1997;11:S127.  
483 3. Kim J, Robb M, Cox J, editors. Humoral and cellular HIV-specific responses induced  
484 by the prime-boost combination of Aventis-Pasteur ALVAC-HIV (vCP205) and oligomeric  
485 HIV-1 gp160MN/LAI-2 in HIV-uninfected adults. Eighth Conference on Retroviruses and  
486 Opportunistic Infections, Chicago, IL; 2001.  
487 4. Klein M. AIDS and HIV vaccines. *Vaccine.* 1999;17:S65-S70.  
488 5. Berman PW. Development of bivalent rgp120 vaccines to prevent HIV type 1  
489 infection. *AIDS Res Hum Retroviruses.* 1998;14 Suppl 3:S277-89.  
490 6. Berman PW, Huang W, Riddle L, Gray AM, Wrinn T, Vennari J, et al. Development of  
491 bivalent (B/E) vaccines able to neutralize CCR5-dependent viruses from the United States  
492 and Thailand. *Virology.* 1999;265(1):1-9.  
493 7. Berman PW, Riddle L, Nakamura G, Haffar OK, Nunes WM, Skehel P, et al. Expression  
494 and immunogenicity of the extracellular domain of the human immunodeficiency virus  
495 type 1 envelope glycoprotein, gp160. *J Virol.* 1989;63(8):3489-98.  
496 8. Haynes BF, Gilbert PB, McElrath MJ, Zolla-Pazner S, Tomaras GD, Alam SM, et al.  
497 Immune-correlates analysis of an HIV-1 vaccine efficacy trial. *N Engl J Med.*  
498 2012;366(14):1275-86.  
499 9. Montefiori DC, Karnasuta C, Huang Y, Ahmed H, Gilbert P, de Souza MS, et al.  
500 Magnitude and Breadth of the Neutralizing Antibody Response in the RV144 and Vax003  
501 HIV-1 Vaccine Efficacy Trials. *J Infect Dis.* 2012;206(3):431-41.  
502 10. O'Connell RJ, Kim JH, Excler JL. The HIV-1 gp120 V1V2 loop: structure, function and  
503 importance for vaccine development. *Expert review of vaccines.* 2014;13(12):1489-500.  
504 11. Gristick HB, von Boehmer L, West Jr AP, Schamber M, Gazumyan A, Golijanin J, et al.  
505 Natively glycosylated HIV-1 Env structure reveals new mode for antibody recognition of  
506 the CD4-binding site. *Nature structural & molecular biology.* 2016;23(10):906-15.  
507 12. Kong L, Lee JH, Doores KJ, Murin CD, Julien JP, McBride R, et al. Supersite of immune  
508 vulnerability on the glycosylated face of HIV-1 envelope glycoprotein gp120. *Nat Struct Mol*  
509 *Biol.* 2013;20(7):796-803.  
510 13. Mouquet H, Scharf L, Euler Z, Liu Y, Eden C, Scheid JF, et al. Complex-type N-glycan  
511 recognition by potent broadly neutralizing HIV antibodies. *Proc Natl Acad Sci U S A.*  
512 2012;109(47):E3268-77.  
513 14. Pancera M, Shahzad-Ul-Hussan S, Doria-Rose NA, McLellan JS, Bailer RT, Dai K, et al.  
514 Structural basis for diverse N-glycan recognition by HIV-1-neutralizing V1-V2-directed  
515 antibody PG16. *Nat Struct Mol Biol.* 2013;20(7):804-13.  
516 15. Pejchal R, Doores KJ, Walker LM, Khayat R, Huang PS, Wang SK, et al. A potent and  
517 broad neutralizing antibody recognizes and penetrates the HIV glycan shield. *Science.*  
518 2011;334(6059):1097-103.  
519 16. Scanlan CN, Pantophlet R, Wormald MR, Ollmann Saphire E, Stanfield R, Wilson IA,  
520 et al. The broadly neutralizing anti-human immunodeficiency virus type 1 antibody 2G12



- 521 recognizes a cluster of alpha1-->2 mannose residues on the outer face of gp120. *J Virol.*  
522 2002;76(14):7306-21.
- 523 17. Walker LM, Huber M, Doores KJ, Falkowska E, Pejchal R, Julien JP, et al. Broad  
524 neutralization coverage of HIV by multiple highly potent antibodies. *Nature.* 2011;477.
- 525 18. Walker LM, Phogat SK, Chan-Hui PY, Wagner D, Phung P, Goss JL, et al. Broad and  
526 potent neutralizing antibodies from an African donor reveal a new HIV-1 vaccine target.  
527 *Science.* 2009;326(5950):285-9.
- 528 19. Sok D, Doores KJ, Briney B, Le KM, Saye-Francisco KL, Ramos A, et al. Promiscuous  
529 glycan site recognition by antibodies to the high-mannose patch of gp120 broadens  
530 neutralization of HIV. *Science translational medicine.* 2014;6.
- 531 20. Pritchard LK, Spencer DI, Royle L, Bonomelli C, Seabright GE, Behrens AJ, et al.  
532 Glycan clustering stabilizes the mannose patch of HIV-1 and preserves vulnerability to  
533 broadly neutralizing antibodies. *Nature communications.* 2015;6:7479.
- 534 21. Stephenson KE, Barouch DH. Broadly neutralizing antibodies for HIV eradication.  
535 *Current HIV/AIDS Reports.* 2016;13(1):31-7.
- 536 22. Gautam R, Nishimura Y, Pegu A, Nason MC, Klein F, Gazumyan A, et al. A single  
537 injection of anti-HIV-1 antibodies protects against repeated SHIV challenges. *Nature.*  
538 2016;533(7601):105.
- 539 23. Hessel AJ, Rakasz EG, Tehrani DM, Huber M, Weisgrau KL, Landucci G, et al. Broadly  
540 neutralizing monoclonal antibodies 2F5 and 4E10 directed against the human  
541 immunodeficiency virus type 1 gp41 membrane-proximal external region protect against  
542 mucosal challenge by simian-human immunodeficiency virus SHIVBa-L. *Journal of virology.*  
543 2010;84(3):1302-13.
- 544 24. Mascola JR. Passive transfer studies to elucidate the role of antibody-mediated  
545 protection against HIV-1. *Vaccine.* 2002;20(15):1922-5.
- 546 25. Shingai M, Donau OK, Plishka RJ, Buckler-White A, Mascola JR, Nabel GJ, et al. Passive  
547 transfer of modest titers of potent and broadly neutralizing anti-HIV monoclonal antibodies  
548 block SHIV infection in macaques. *J Exp Med.* 2014;211.
- 549 26. Moldt B, Rakasz EG, Schultz N, Chan-Hui PY, Swiderek K, Weisgrau KL, et al. Highly  
550 potent HIV-specific antibody neutralization in vitro translates into effective protection  
551 against mucosal SHIV challenge in vivo. *Proc Natl Acad Sci USA.* 2012;109.
- 552 27. Hessel AJ, Rakasz EG, Poignard P, Hangartner L, Landucci G, Forthal DN, et al.  
553 Broadly neutralizing human anti-HIV antibody 2G12 is effective in protection against  
554 mucosal SHIV challenge even at low serum neutralizing titers. *PLoS Pathog.* 2009;5.
- 555 28. Barouch DH, Whitney JB, Moldt B, Klein F, Oliveira TY, Liu J, et al. Therapeutic  
556 efficacy of potent neutralizing HIV-1-specific monoclonal antibodies in SHIV-infected  
557 rhesus monkeys. *Nature.* 2013;503.
- 558 29. Shingai M, Nishimura Y, Klein F, Mouquet H, Donau OK, Plishka R, et al. Antibody-  
559 mediated immunotherapy of macaques chronically infected with SHIV suppresses  
560 viraemia. *Nature.* 2013;503(7475):277-80.
- 561 30. Bonomelli C, Doores KJ, Dunlop DC, Thaney V, Dwek RA, Burton DR, et al. The glycan  
562 shield of HIV is predominantly oligomannose independently of production system or viral  
563 clade. *PLoS One.* 2011;6(8):e23521.



- 564 31. Doores KJ, Bonomelli C, Harvey DJ, Vasiljevic S, Dwek RA, Burton DR, et al. Envelope  
565 glycans of immunodeficiency virions are almost entirely oligomannose antigens. *Proc Natl*  
566 *Acad Sci U S A*. 2010;107(31):13800-5.
- 567 32. Panico M, Bouché L, Binet D, O'Connor M-J, Rahman D, Pang P-C, et al. Mapping the  
568 complete glycoproteome of virion-derived HIV-1 gp120 provides insights into broadly  
569 neutralizing antibody binding. *Scientific reports*. 2016;6:32956.
- 570 33. Flynn NM, Forthal DN, Harro CD, Judson FN, Mayer KH, Para MF. Placebo-controlled  
571 phase 3 trial of a recombinant glycoprotein 120 vaccine to prevent HIV-1 infection. *J Infect*  
572 *Dis*. 2005;191(5):654-65.
- 573 34. Pitisuttithum P, Gilbert P, Gurwith M, Heyward W, Martin M, van Griensven F, et al.  
574 Randomized, double-blind, placebo-controlled efficacy trial of a bivalent recombinant  
575 glycoprotein 120 HIV-1 vaccine among injection drug users in Bangkok, Thailand. *J Infect*  
576 *Dis*. 2006;194(12):1661-71.
- 577 35. Wang Z, Lorin C, Koutsoukos M, Franco D, Bayat B, Zhang Y, et al. Comprehensive  
578 Characterization of Reference Standard Lots of HIV-1 Subtype C Gp120 Proteins for Clinical  
579 Trials in Southern African Regions. *Vaccines*. 2016;4(2):17.
- 580 36. Yu B, Morales JF, O'Rourke SM, Tatsuno GP, Berman PW. Glycoform and Net Charge  
581 Heterogeneity in gp120 Immunogens Used in HIV Vaccine Trials. *PLoS One*.  
582 2012;7(8):e43903.
- 583 37. Barnett SW, Lu S, Srivastava I, Cherpelis S, Gettie A, Blanchard J, et al. The ability of  
584 an oligomeric human immunodeficiency virus type 1 (HIV-1) envelope antigen to elicit  
585 neutralizing antibodies against primary HIV-1 isolates is improved following partial  
586 deletion of the second hypervariable region. *J Virol*. 2001;75(12):5526-40.
- 587 38. Lasky LA, Groopman JE, Fennie CW, Benz PM, Capon DJ, Dowbenko DJ, et al.  
588 Neutralization of the AIDS retrovirus by antibodies to a recombinant envelope  
589 glycoprotein. *Science*. 1986;233(4760):209-12.
- 590 39. Haas J, Park EC, Seed B. Codon usage limitation in the expression of HIV-1 envelope  
591 glycoprotein. *Curr Biol*. 1996;6(3):315-24.
- 592 40. Easterhoff D, Moody MA, Fera D, Cheng H, Ackerman M, Wiehe K, et al. Boosting of  
593 HIV envelope CD4 binding site antibodies with long variable heavy third complementarity  
594 determining region in the randomized double blind RV305 HIV-1 vaccine trial. *PLoS*  
595 *pathogens*. 2017;13(2):e1006182.
- 596 41. Martinez DR, Permar SR, Fouda GG. Contrasting adult and infant immune responses  
597 to HIV infection and vaccination. *Clinical and Vaccine Immunology*. 2016;23(2):84-94.
- 598 42. McGuire EP, Fong Y, Toote C, Cunningham CK, McFarland EJ, Borkowsky W, et al.  
599 HIV-Exposed Infants Vaccinated with an MF59/Recombinant gp120 Vaccine Have Higher-  
600 Magnitude Anti-V1V2 IgG Responses than Adults Immunized with the Same Vaccine.  
601 *Journal of virology*. 2018;92(1):e01070-17.
- 602 43. Pitisuttithum P, Nitayaphan S, Chariyalertsak S, Karasavvas N, Kaewkungwal J,  
603 Ngauy V, et al. RV306, an Evaluation of a 48 Week ALVAC-HIV AIDSVAX B/E Vaccination  
604 Regimen in Thailand: Participation Rates for Optional Specimen Collections. *AIDS research*  
605 *and human retroviruses*. 2014;30(S1):A264-A.
- 606 44. Rerks-Ngarm S, Pitisuttithum P, Excler J-L, Nitayaphan S, Kaewkungwal J, Prensri N,  
607 et al. Randomized, Double-Blind Evaluation of Late Boost Strategies for HIV-Uninfected

- 608 Vaccine Recipients in the RV144 HIV Vaccine Efficacy Trial. *The Journal of Infectious*  
609 *Diseases*. 2017;215(8):1255-63.
- 610 45. Leonard CK, Spellman MW, Riddle L, Harris RJ, Thomas JN, Gregory TJ. Assignment  
611 of intrachain disulfide bonds and characterization of potential glycosylation sites of the  
612 type 1 recombinant human immunodeficiency virus envelope glycoprotein (gp120)  
613 expressed in Chinese hamster ovary cells. *J Biol Chem*. 1990;265(18):10373-82.
- 614 46. Go EP, Herschhorn A, Gu C, Castillo-Menendez L, Zhang S, Mao Y, et al. Comparative  
615 analysis of the glycosylation profiles of membrane-anchored HIV-1 envelope glycoprotein  
616 trimers and soluble gp140. *Journal of virology*. 2015;89(16):8245-57.
- 617 47. Sinclair AM, Elliott S. Glycoengineering: the effect of glycosylation on the properties  
618 of therapeutic proteins. *J Pharm Sci*. 2005;94(8):1626-35.
- 619 48. Chung NP, Matthews K, Kim HJ, Ketas TJ, Golabek M, de Los Reyes K, et al. Stable 293  
620 T and CHO cell lines expressing cleaved, stable HIV-1 envelope glycoprotein trimers for  
621 structural and vaccine studies. *Retrovirology*. 2014;11(1):33.
- 622 49. Dey AK, Cupo A, Ozorowski G, Sharma VK, Behrens AJ, Go EP, et al. cGMP production  
623 and analysis of BG505 SOSIP. 664, an extensively glycosylated, trimeric HIV-1 envelope  
624 glycoprotein vaccine candidate. *Biotechnology and bioengineering*. 2017.
- 625 50. Go EP, Irungu J, Zhang Y, Dalpathado DS, Liao HX, Sutherland LL, et al. Glycosylation  
626 Site-Specific Analysis of HIV Envelope Proteins (JR-FL and CON-S) Reveals Major  
627 Differences in Glycosylation Site Occupancy, Glycoform Profiles, and Antigenic Epitopes'  
628 Accessibility. *Journal of proteome research*. 2008;7(4):1660-74.
- 629 51. Sanders RW, Derking R, Cupo A, Julien JP, Yasmeen A, de Val N, et al. A Next-  
630 Generation Cleaved, Soluble HIV-1 Env Trimer, BG505 SOSIP.664 gp140, Expresses  
631 Multiple Epitopes for Broadly Neutralizing but Not Non-Neutralizing Antibodies. *PLoS*  
632 *Pathog*. 2013;9(9):e1003618.
- 633 52. Srivastava IK, Kan E, Sun Y, Sharma VA, Cisto J, Burke B, et al. Comparative  
634 evaluation of trimeric envelope glycoproteins derived from subtype C and B HIV-1 R5  
635 isolates. *Virology*. 2008;372(2):273-90.
- 636 53. Srivastava IK, Stamatatos L, Legg H, Kan E, Fong A, Coates SR, et al. Purification and  
637 characterization of oligomeric envelope glycoprotein from a primary R5 subtype B human  
638 immunodeficiency virus. *J Virol*. 2002;76(6):2835-47.
- 639 54. Zambonelli C, Dey AK, Hilt S, Stephenson S, Go EP, Clark DF, et al. Generation and  
640 characterization of a bivalent HIV-1 subtype C gp120 protein boost for proof-of-concept  
641 HIV vaccine efficacy trials in Southern Africa. *PloS one*. 2016;11(7):e0157391.
- 642 55. Berman PW, editor *Strategies for Improving the AIDSVAX Vaccines*. NIAID HIV Env  
643 Manufacturing Workshop; 2015 July 11-12; Rockville, MD.
- 644 56. Wen Y, Trin HV, Linton CE, Tani C, Norais N, Martinez- Guzman D, et al. Generation  
645 and characterization of a bivalent protein boost for future clinical trials: HIV-1 subtypes  
646 CRF01AE and B gp120 antigens with a potential adjuvant. *PLOS ONE*. 2018  
647 13(4):e0194266
- 648 57. Byrne G, O'Rourke SM, Alexander DL, Yu B, Doran RC, Wright M, et al. CRISPR/Cas9  
649 gene editing for the creation of an MGAT1  
650 deficient CHO cell line to control HIV-1 vaccine glycosylation. *PLOS Biology*. 2018(In press).

- 651 58. Doran RC, Tatsuno GP, O'Rourke SM, Yu B, Alexander DL, Mesa KA, et al. Glycan  
652 modifications to the gp120 immunogens used in the RV144 vaccine trial improve binding  
653 to broadly neutralizing antibodies. *PLOS ONE*. 2018;13(4):e0196370.
- 654 59. Wurm FM. Production of recombinant protein therapeutics in cultivated  
655 mammalian cells. *Nature biotechnology*. 2004;22(11):1393-8.
- 656 60. Fussenegger M, Bailey JE, Hauser H, Mueller PP. Genetic optimization of  
657 recombinant glycoprotein production by mammalian cells. *Trends in biotechnology*.  
658 1999;17(1):35-42.
- 659 61. de la Cruz Edmonds MC, Tellers M, Chan C, Salmon P, Robinson DK, Markusen J.  
660 Development of transfection and high-producer screening protocols for the CHOK1SV cell  
661 system. *Molecular biotechnology*. 2006;34(2):179-90.
- 662 62. Morales JF, Morin TJ, Yu B, Tatsuno GP, O'Rourke SM, Theolis R, Jr., et al. HIV-1  
663 Envelope Proteins and V1/V2 Domain Scaffolds with Mannose-5 to Improve the Magnitude  
664 and Quality of Protective Antibody Responses to HIV-1. *J Biol Chem*. 2014;289(30):20526-  
665 42.
- 666 63. Pasupuleti VK, Demain AL. *Protein hydrolysates in biotechnology*: Springer Science  
667 & Business Media; 2010.
- 668 64. Wu X, Yang ZY, Li Y, Hogerkorp CM, Schief WR, Seaman MS, et al. Rational Design of  
669 Envelope Identifies Broadly Neutralizing Human Monoclonal Antibodies to HIV-1. *Science*.  
670 2010;329(5993):856-61.
- 671 65. Zhou T, Georgiev I, Wu X, Yang ZY, Dai K, Finzi A, et al. Structural Basis for Broad and  
672 Potent Neutralization of HIV-1 by Antibody VRC01. *Science*. 2010;329(5993):811-7.
- 673 66. McLellan JS, Pancera M, Carrico C, Gorman J, Julien JP, Khayat R, et al. Structure of  
674 HIV-1 gp120 V1/V2 domain with broadly neutralizing antibody PG9. *Nature*.  
675 2011;480(7377):336-43.
- 676 67. Amin MN, McLellan JS, Huang W, Orwenyo J, Burton DR, Koff WC, et al. Synthetic  
677 glycopeptides reveal the glycan specificity of HIV-neutralizing antibodies. *Nat Chem Biol*.  
678 2013;9(8):521-6.
- 679 68. Go EP, Liao H-X, Alam SM, Hua D, Haynes BF, Desaire H. Characterization of host-cell  
680 line specific glycosylation profiles of early transmitted/founder HIV-1 gp120 envelope  
681 proteins. *Journal of proteome research*. 2013;12(3):1223-34.
- 682 69. Zhu X, Borchers C, Bienstock RJ, Tomer KB. Mass spectrometric characterization of  
683 the glycosylation pattern of HIV-gp120 expressed in CHO cells. *Biochemistry*.  
684 2000;39(37):11194-204.
- 685 70. Stewart-Jones GB, Soto C, Lemmin T, Chuang GY, Druz A, Kong R, et al. Trimeric HIV-  
686 1-Env Structures Define Glycan Shields from Clades A, B, and G. *Cell*. 2016.
- 687 71. Go EP, Ding H, Zhang S, Ringe RP, Nicely N, Hua D, et al. Glycosylation Benchmark  
688 Profile for HIV-1 Envelope Glycoprotein Production Based on Eleven Env Trimers. *Journal*  
689 *of Virology*. 2017;91(9):e02428-16.
- 690 72. Follmann D, Duerr A, Tabet S, Gilbert P, Moodie Z, Fast P, et al. Endpoints and  
691 regulatory issues in HIV vaccine clinical trials: lessons from a workshop. *Journal of*  
692 *acquired immune deficiency syndromes (1999)*. 2007;44(1):49.

- 693 73. Bradley T, Pollara J, Santra S, Vandergrift N, Pittala S, Bailey-Kellogg C, et al.  
694 Pentavalent HIV-1 vaccine protects against simian-human immunodeficiency virus  
695 challenge. *Nature communications*. 2017;8:15711.
- 696 74. Briney B, Sok D, Jardine JG, Kulp DW, Skog P, Menis S, et al. Tailored immunogens  
697 direct affinity maturation toward HIV neutralizing antibodies. *Cell*. 2016;166(6):1459-70.  
698 e11.
- 699 75. de Taeye SW, Moore JP, Sanders RW. HIV-1 envelope trimer design and  
700 immunization strategies to induce broadly neutralizing antibodies. *Trends in immunology*.  
701 2016;37(3):221-32.
- 702 76. Escolano A, Steichen JM, Dosenovic P, Kulp DW, Golijanin J, Sok D, et al. Sequential  
703 immunization elicits broadly neutralizing anti-HIV-1 antibodies in Ig knockin mice. *Cell*.  
704 2016;166(6):1445-58. e12.
- 705 77. Williams WB, Zhang J, Jiang C, Nicely NI, Fera D, Luo K, et al. Initiation of HIV  
706 neutralizing B cell lineages with sequential envelope immunizations. *Nature*  
707 *communications*. 2017;8(1):1732.
- 708 78. Bonsignori M, Hwang KK, Chen X, Tsao CY, Morris L, Gray E, et al. Analysis of a  
709 Clonal Lineage of HIV-1 Envelope V2/V3 Conformational Epitope-Specific Broadly  
710 Neutralizing Antibodies and Their Inferred Unmutated Common Ancestors. *J Virol*.  
711 2011;85(19):9998-10009.
- 712 79. Jardine JG, Ota T, Sok D, Pauthner M, Kulp DW, Kalyuzhniy O, et al. Priming a broadly  
713 neutralizing antibody response to HIV-1 using a germline-targeting immunogen. *Science*.  
714 2015.
- 715 80. McGuire AT, Gray MD, Dosenovic P, Gitlin AD, Freund NT, Petersen J, et al.  
716 Specifically modified Env immunogens activate B-cell precursors of broadly neutralizing  
717 HIV-1 antibodies in transgenic mice. *Nature communications*. 2016;7.
- 718 81. Gray GE, Laher F, Doherty T, Abdool Karim S, Hammer S, Mascola J, et al. Which New  
719 Health Technologies Do We Need to Achieve an End to HIV/AIDS? *PLOS Biology*.  
720 2016;14(3):e1002372.
- 721 82. Capon DJ, Chamow SM, Mordenti J, Marsters SA, Gregory T, Mitsuya H, et al.  
722 Designing CD4 immunoadhesins for AIDS therapy. *Nature*. 1989;337(6207):525-31.
- 723 83. Moritz B, Becker PB, Göpfert U. CMV promoter mutants with a reduced propensity  
724 to productivity loss in CHO cells. *Scientific Reports*. 2015;5:16952.
- 725 84. Lee C, Ly C, Sauerwald T, Kelly T, Moore G. High-throughput screening of cell lines  
726 expressing monoclonal antibodies. *Bioprocess International*. 2006;4(sup 3):32-5.

**by expression of green fluorescent protein (GFP).** MGAT1<sup>-</sup> CHO and CHO-S cells were transfected by electroporation with a linearized green fluorescent protein expression plasmid or mock electroporated. Forty-eight hours after transfection, viability was determined by Trypan blue exclusion on a BioRad TC10 as >95% by for both lines. Flow cytometry on a LSRII (Becton Dickinson, San Jose, CA) was used to calculate the percentage of transfected cells expressing GFP.

**Figure 2. Primary identification of high producer MGAT1<sup>-</sup> CHO lines expressing A244\_N332 rgp120 by immunofluorescent labeling.** (A) G418 selected colonies visible in a single 35mm well illuminated with white light at 6 days. (B) The same single 35mm well illuminated with 490 nm wavelength light. Colonies actively secreting rgp120 have a green “halo” visible at 525 nm. (C) Relative mean exterior fluorescence of halo for more than 10,000 colonies imaged by the ClonePix2 plotted by rank. The top ranking 0.1% of colonies (44) were robotically picked and cultured. The six clones expressing 0.2-0.4 g/L at day 56 are shown in red.

**Figure 3. Analysis of A244\_N332-rgp120 secreted from stable MGAT1<sup>-</sup> CHO cell lines.** Six stable MGAT1<sup>-</sup> CHO cell lines identified with the ClonePix2 were selected as potential substrates for HIV vaccine production. (A) Immunoblot of affinity-purified rgp120 (50 ng per lane) produced by each of six A244\_N332-rgp120 cell lines: 3E, 5C, 5D, 3F, 6B, and 5F. Purified A244\_N332-rgp120 produced in normal CHO DG44 cells

(692) was shown for purpose of comparison. **(B)** Comparison of A244\_N332-rgp120 protein yields as determined by ELISA from the six MGAT1<sup>-</sup> CHO cell lines. **(C)** SDS PAGE of rgp120 produced by the 5F MGAT1<sup>-</sup> CHO cell line. Supernatant samples (10 µl per lane) collected over the time course of the culture were electrophoresed on a 4-12% NuPage PAGE SDS gel in MOPS buffer (Thermo Scientific, Waltham, MA). The gel was stained with Simply Blue (Thermo Scientific, Waltham, MA) and visualized using an Innotech FluoChem2 system (Genetic Technologies, Grover, MO).

**Figure 4. Growth and expression of the 5F MGAT1<sup>-</sup> CHO cell line expressing A244\_N332-rgp120 in shake flask cultures.** Cells were cultured under standard conditions until day 6 when 1 mM Sodium butyrate was added, and the temperature shifted to 32°C. Panels **A-C**: cells were fed with CHO Feed A and yeastolate as indicated, and harvested at day 13 (data from 3 shake flasks averaged). **(A)** Timecourse graph of viable cell densities (VCD) determined by trypan-blue exclusion on a BioRad T20 cell counter. **(B)** Timecourse of cell viabilities determined by trypan-blue exclusion. **(C)** Timecourse of A244\_N332-rgp120 protein accumulation determined by ELISA. Panels **D-F** demonstrate optimization of protein expression (at >1g/L) by use of different feed additives. Five duplicate pairs of cultures were fed (as indicated) with CHO Feed C and either yeastolate (BD, Franklin Lakes NJ), cottonseed, wheat, pea hydrolsate (Friesland Camparia, Delhi, NY) or CD-hydrolysate (SAFC, Calsbad CA) at days 6, 8 and 10, and harvested at day 12 (data from each pair of shake flasks is averaged). **(D)** Timecourse graph of viable cell densities (VCD) determined by trypan-blue exclusion on a BioRad T20 cell counter. **(E)** Timecourse of cell viabilities determined by trypan-blue



exclusion. **(F)** Timecourse of A244\_N332-rgp120 protein accumulation determined by ELISA.

**Figure 5. SDS-PAGE analysis of A244\_N332 rgp120 HIV produced in 5F MGAT1<sup>-</sup> CHO and CHO-S cells treated with PNGase or EndoH.** Enzymes and buffers were purchased from (New England Biolabs, Ipswich, MA). Purified protein was denatured and reduced then incubated overnight at 37°C with or without glycosidase. Protein was resolved (2 µg/lane) on 4–12% SDS-PAGE gel and stained with Simply Blue. Plus (+) indicates enzyme treatment, minus indicates untreated.

**Figure 6. Binding of bN-mAbs to A244-rgp120 produced in normal and A244\_N332-rgp120 produced in MGAT1<sup>-</sup> CHO cell lines.** A244\_N332-rgp120 was purified from the stable clone 5F MGAT1<sup>-</sup> CHO cell line (closed circles) or from the MGAT1<sup>-</sup> CHO cells (open circles) transiently transfected with the UCSC 1331 plasmid. A244-rgp120 expressed and purified from transiently transfected CHO-S cells (open squares). Antibody binding was measured by a fluorescent immunoassay (FIA).

**Figure 7. The timeline for development of stable MGAT1<sup>-</sup> CHO cell lines expressing HIV-1 rgp120.** Leading clones expressing 0.2-0.4 g/L in shake flasks under standard laboratory conditions were selected in less than two months. Production was subsequently increased to levels of g/L rgp120 production with minimal feed optimization.





## Mock Transfection

### CHO-S

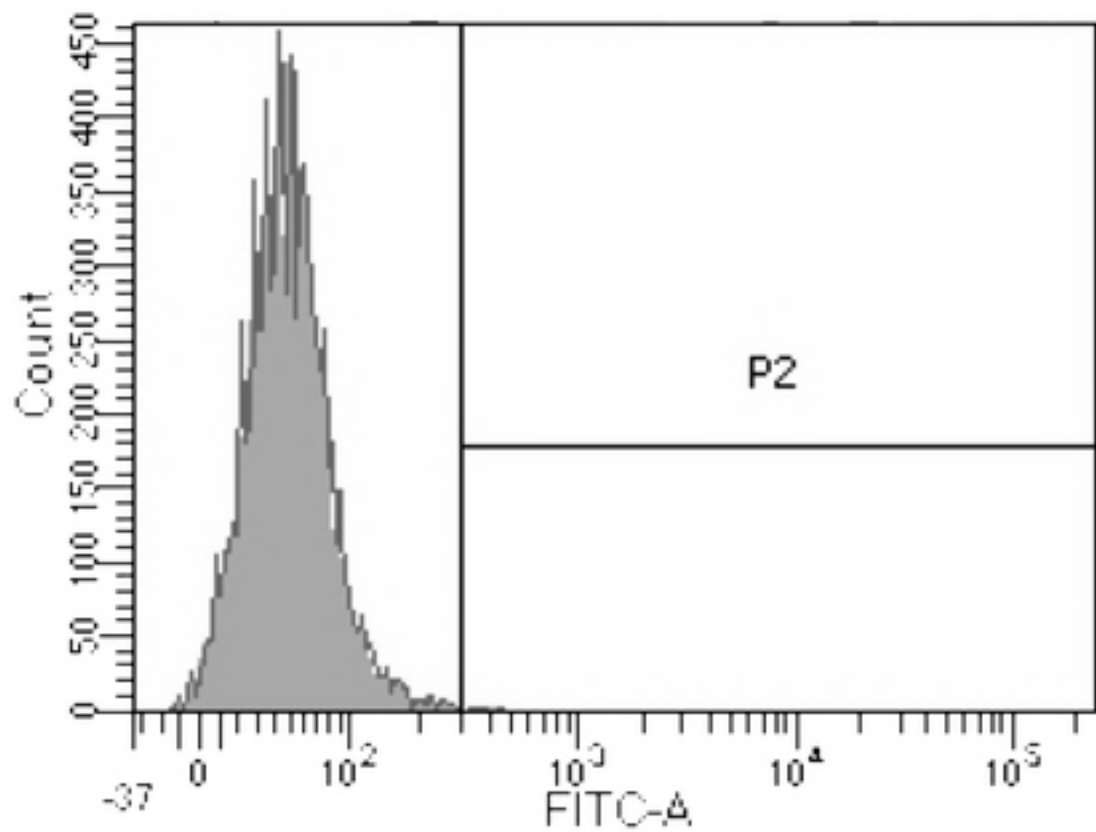

## Transfection with GFP

### CHO-S

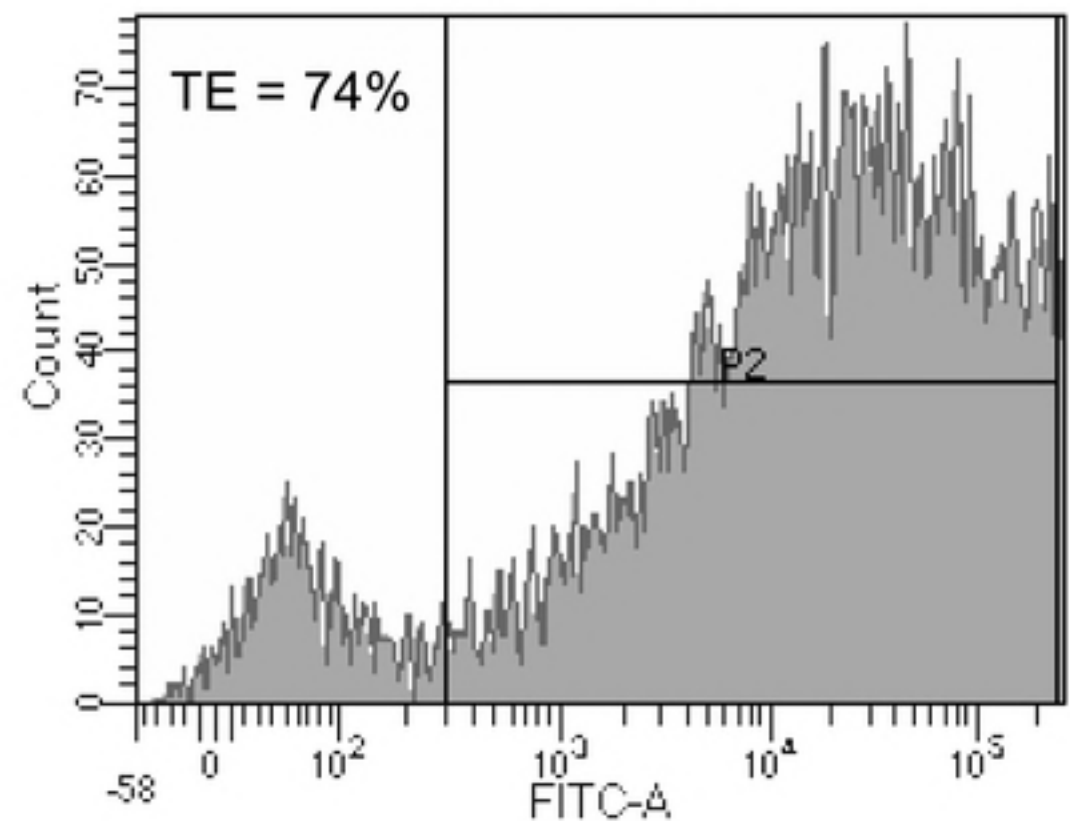

### MGAT1- CHO

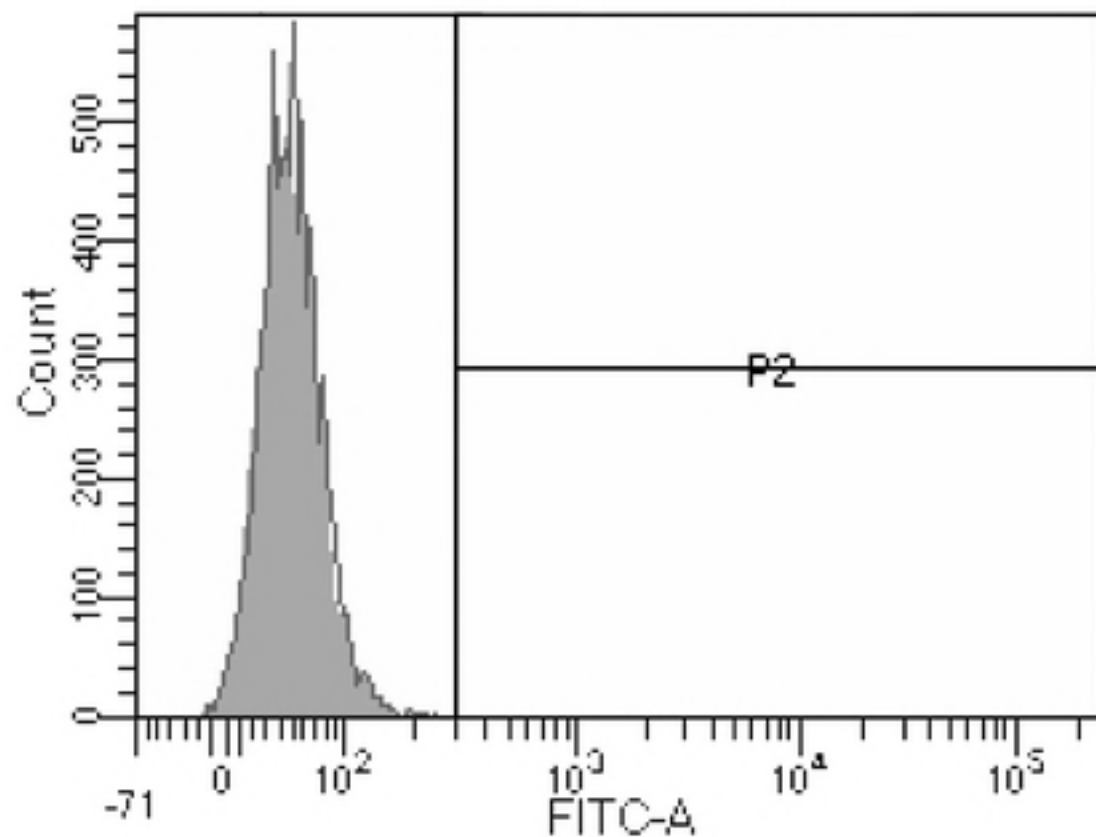

### MGAT1- CHO

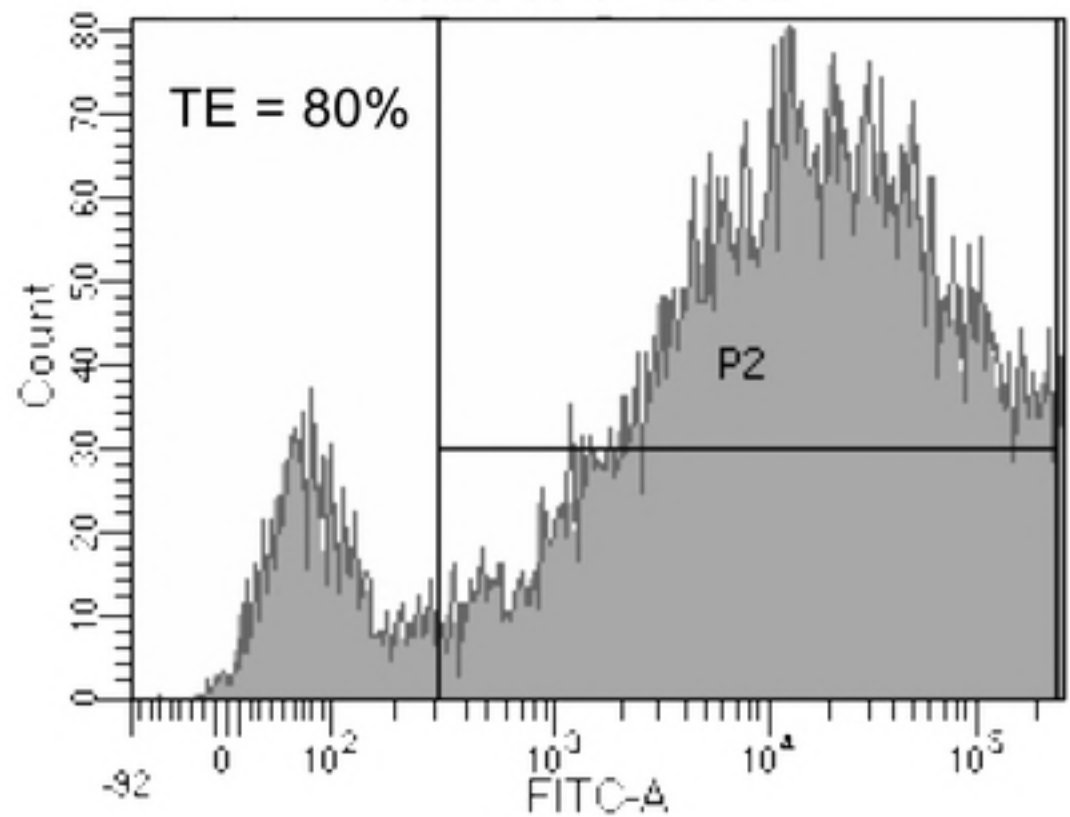

A

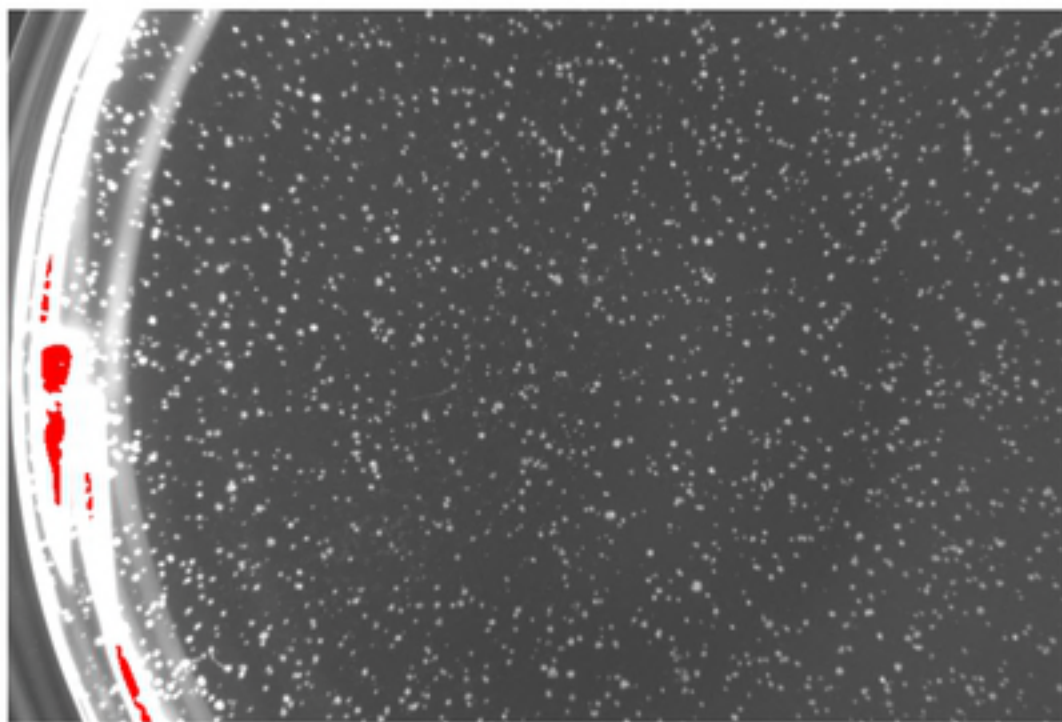

B

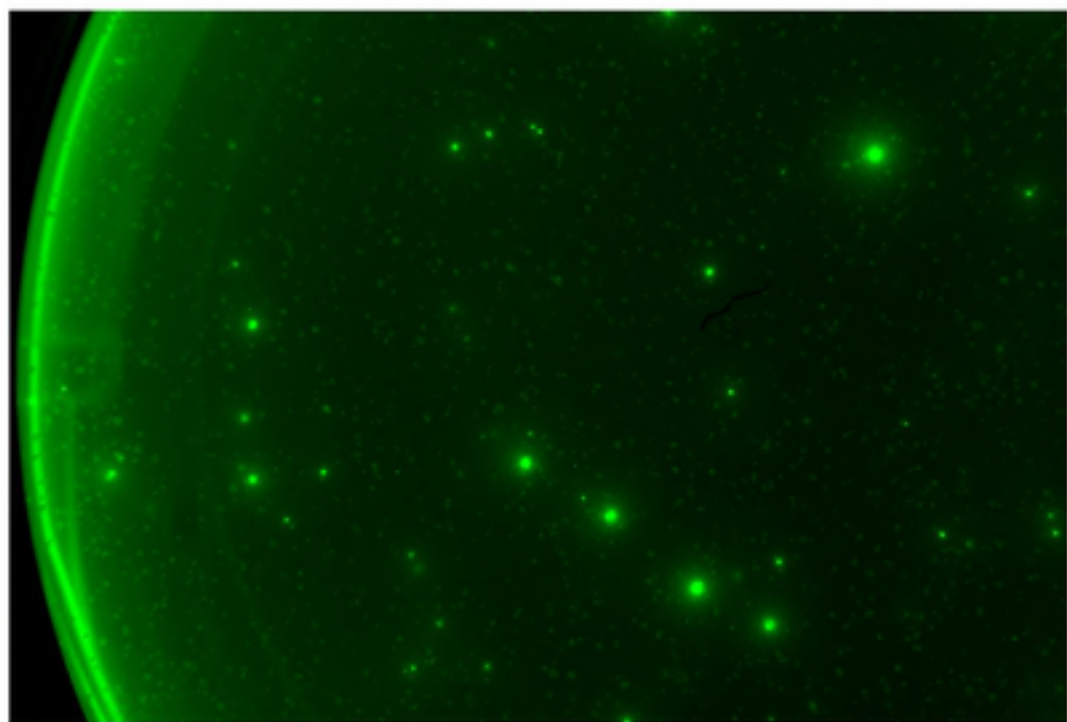

C

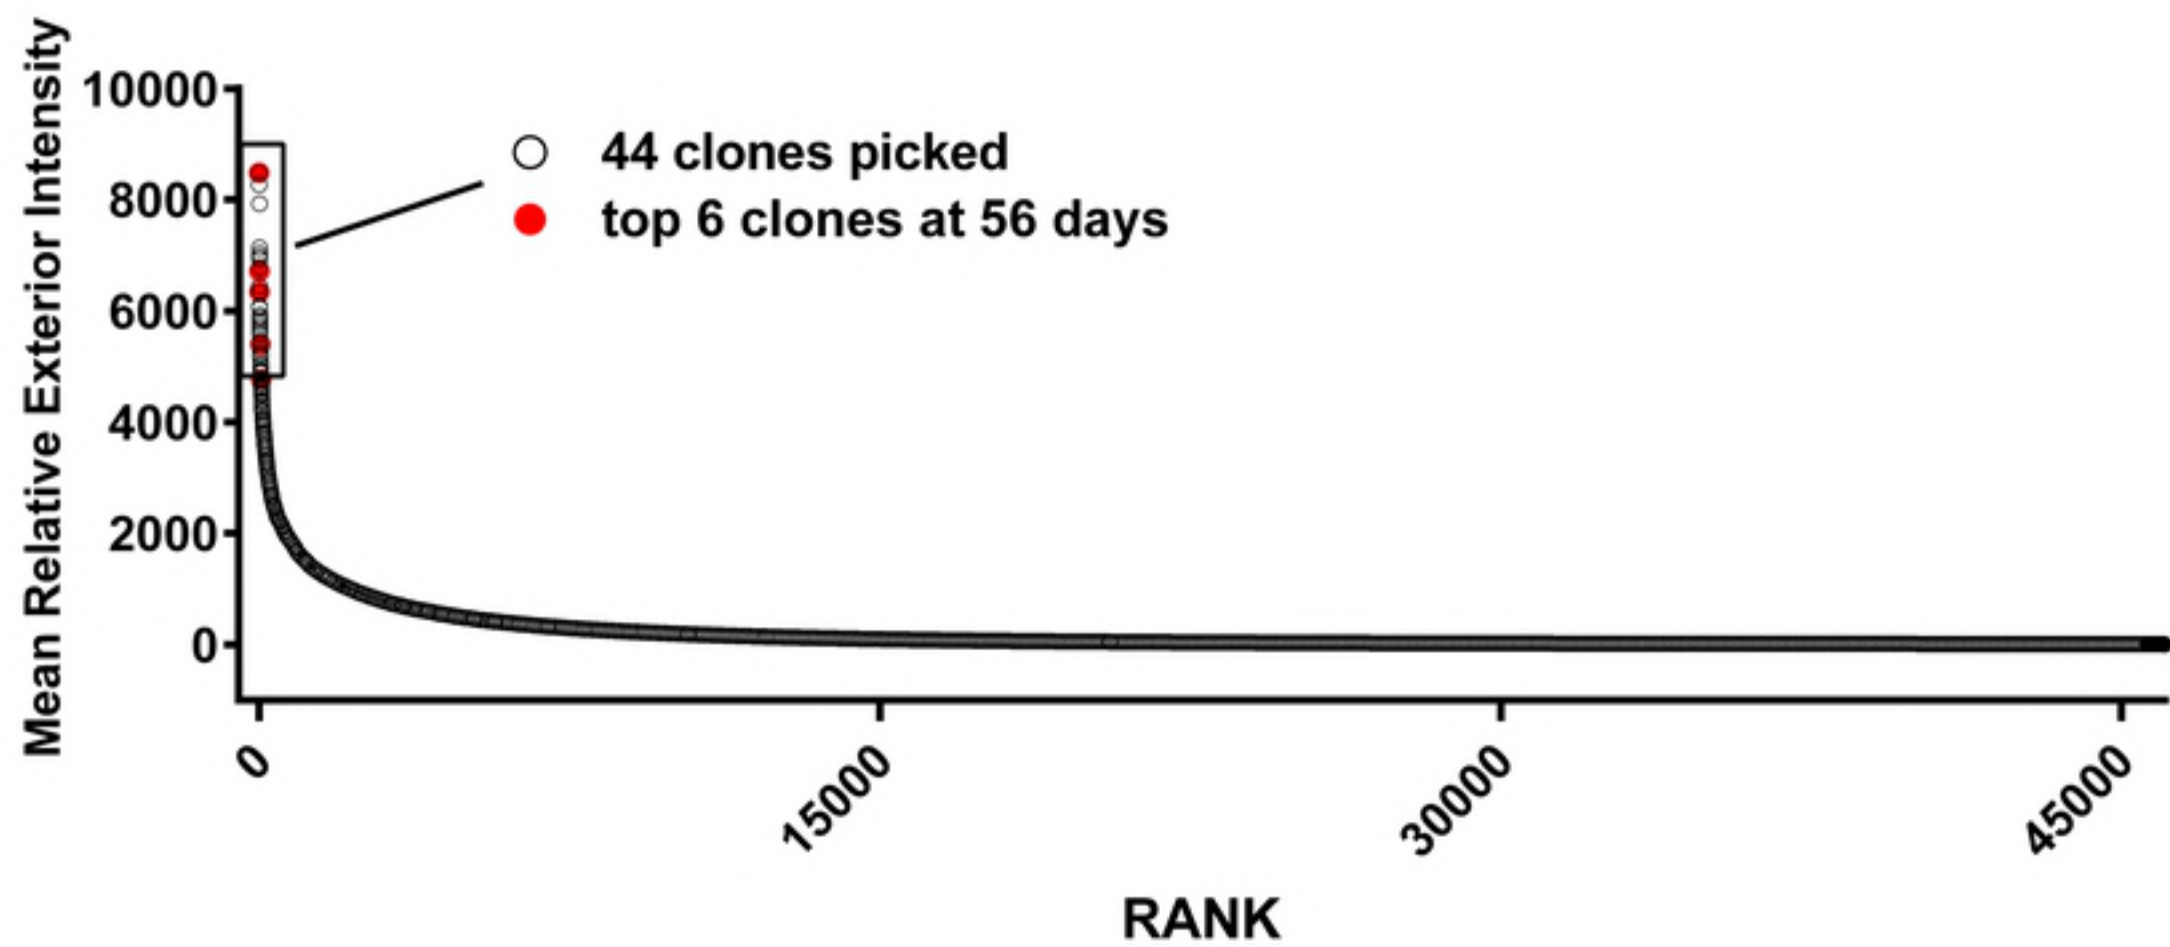

**A**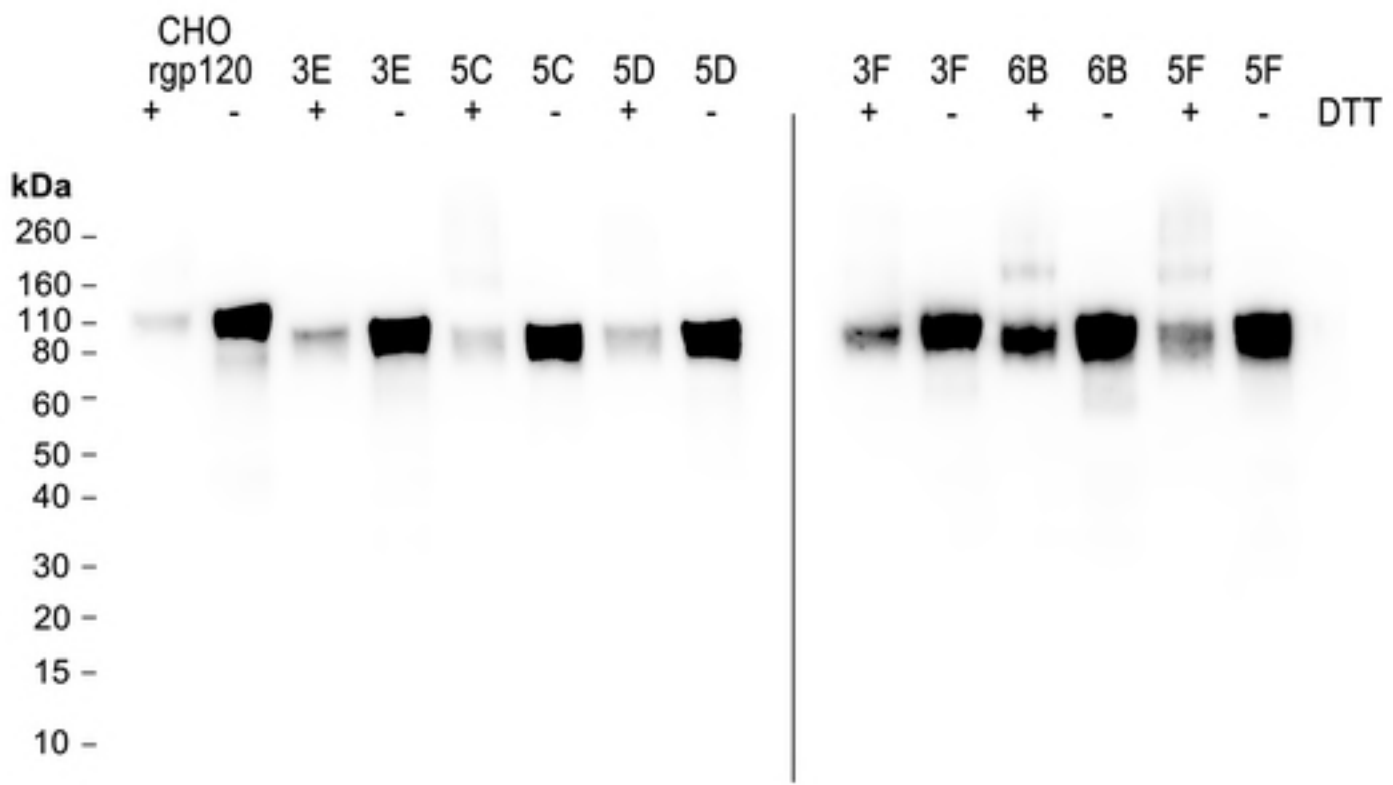**B**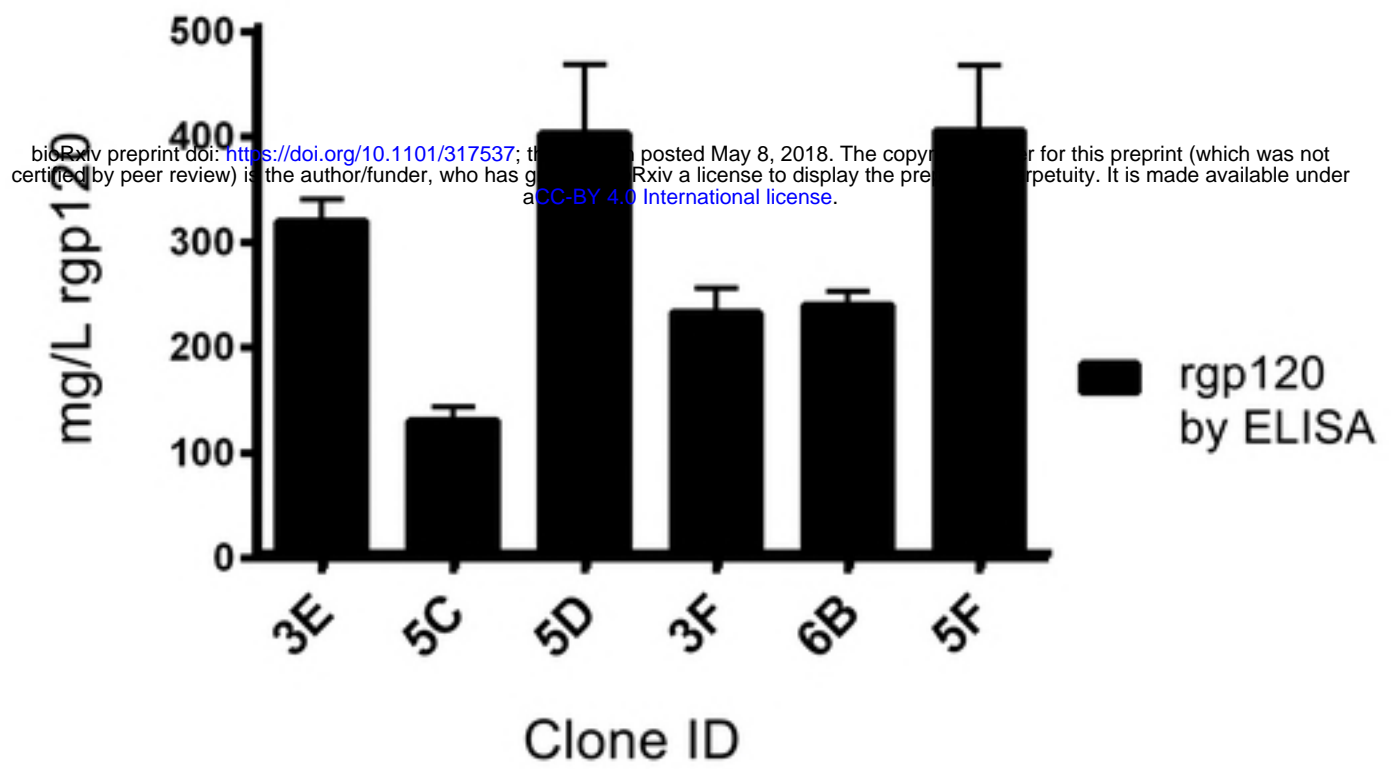**C**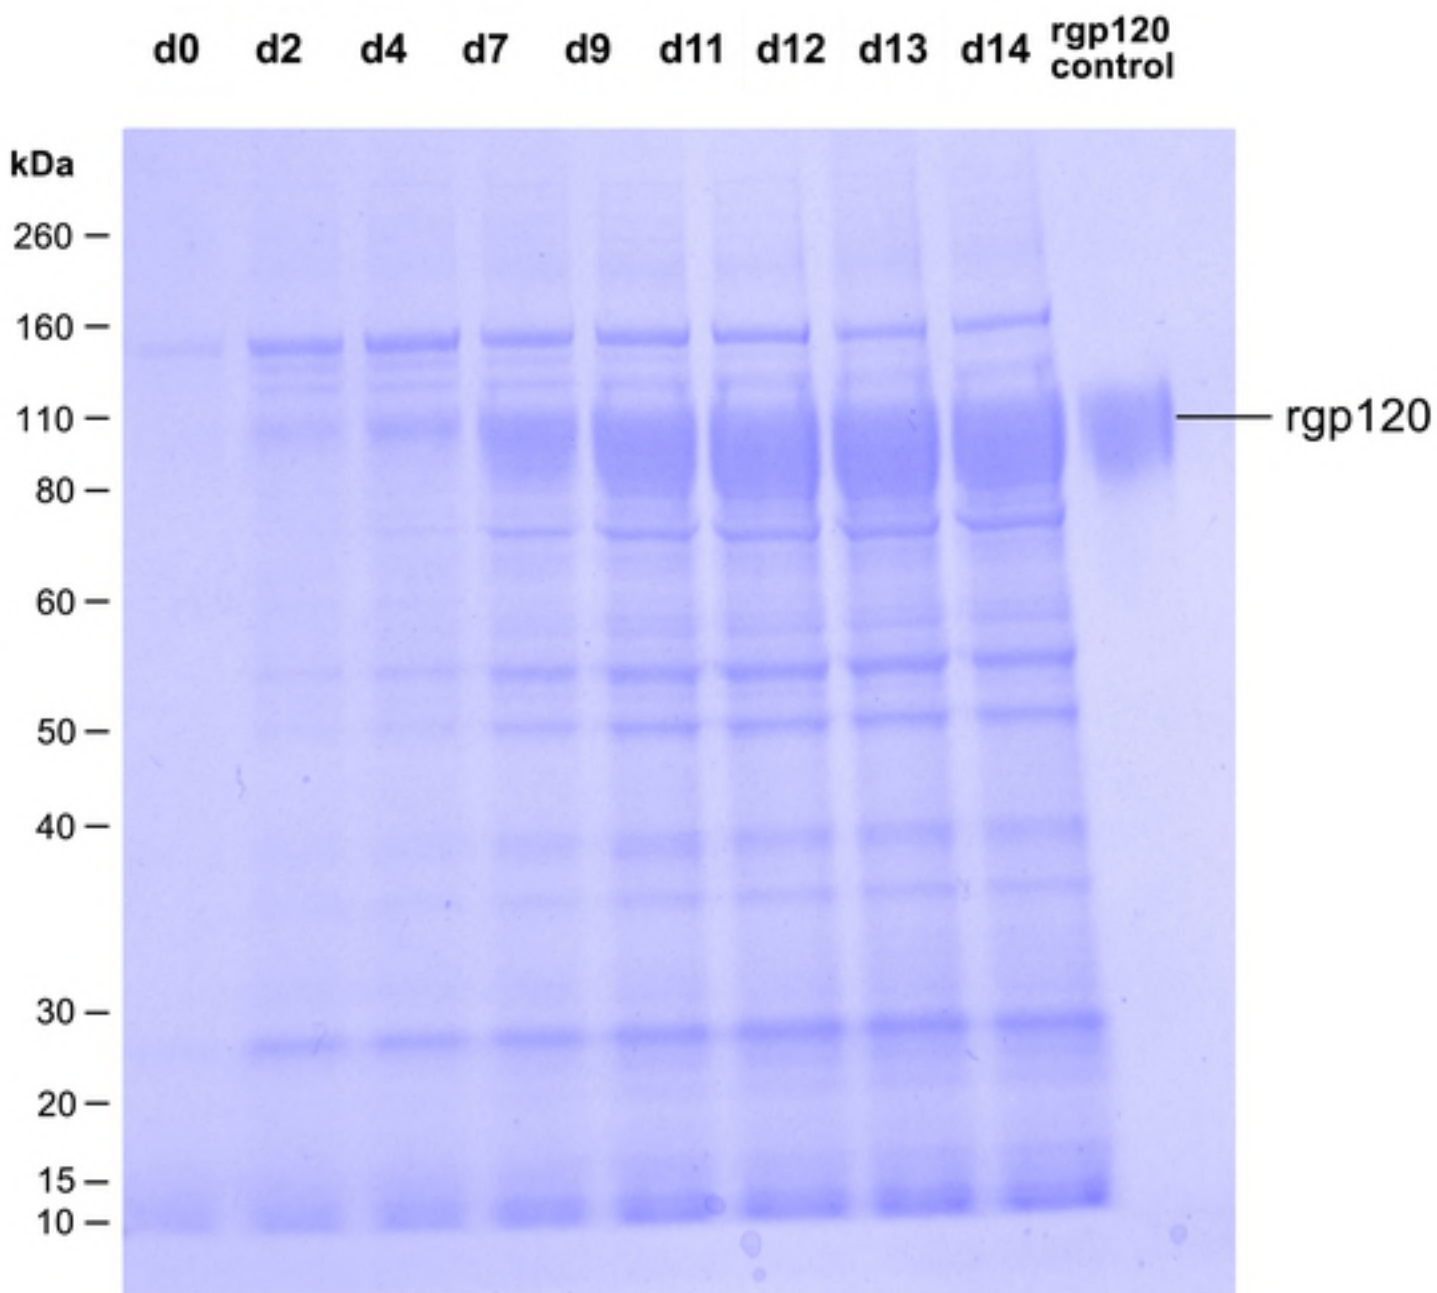

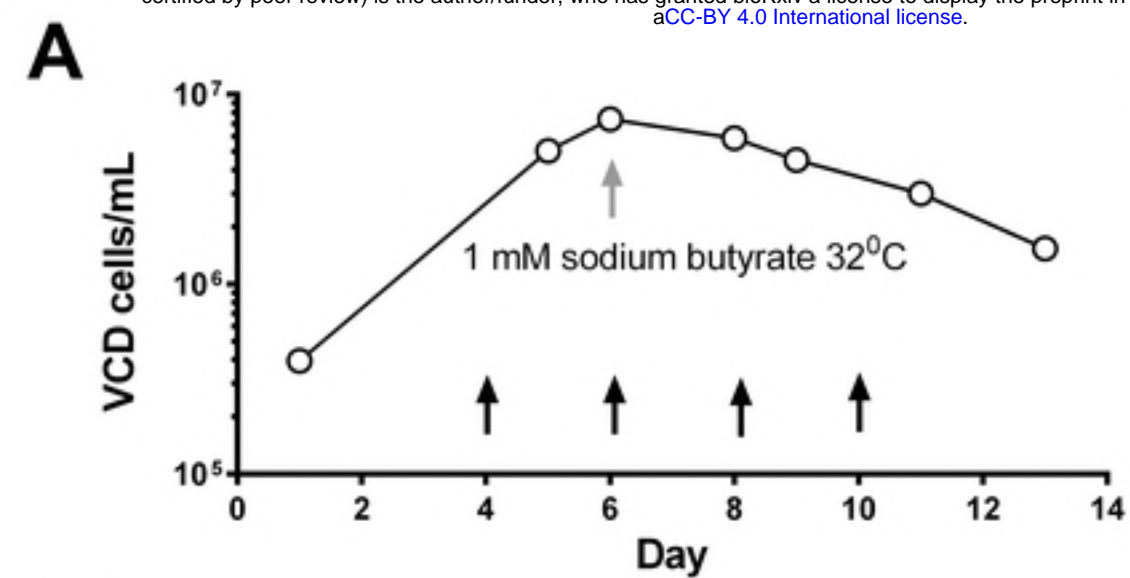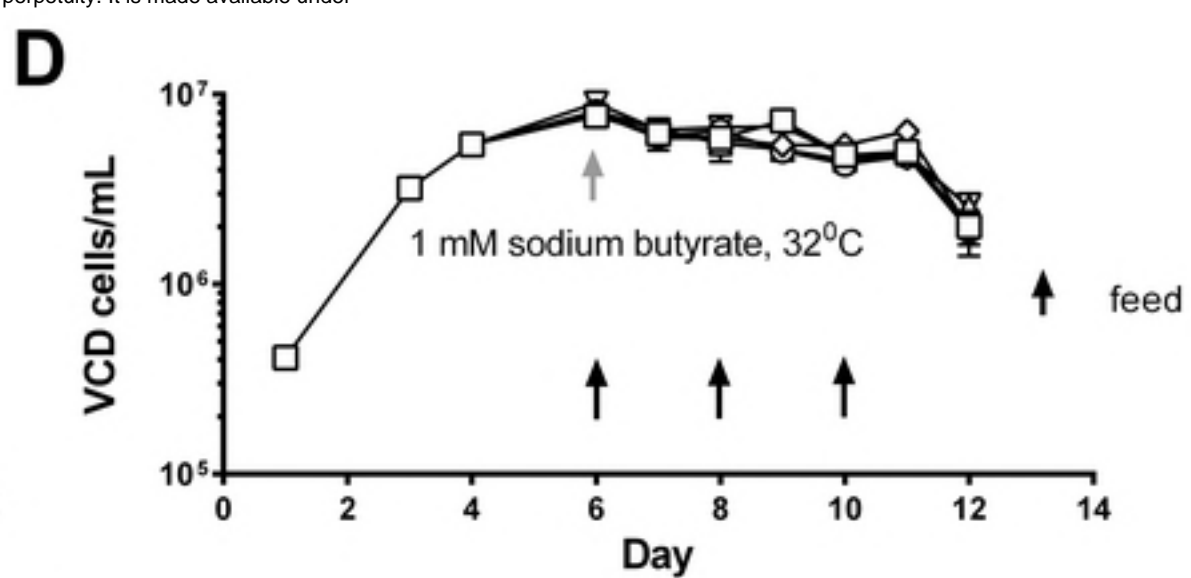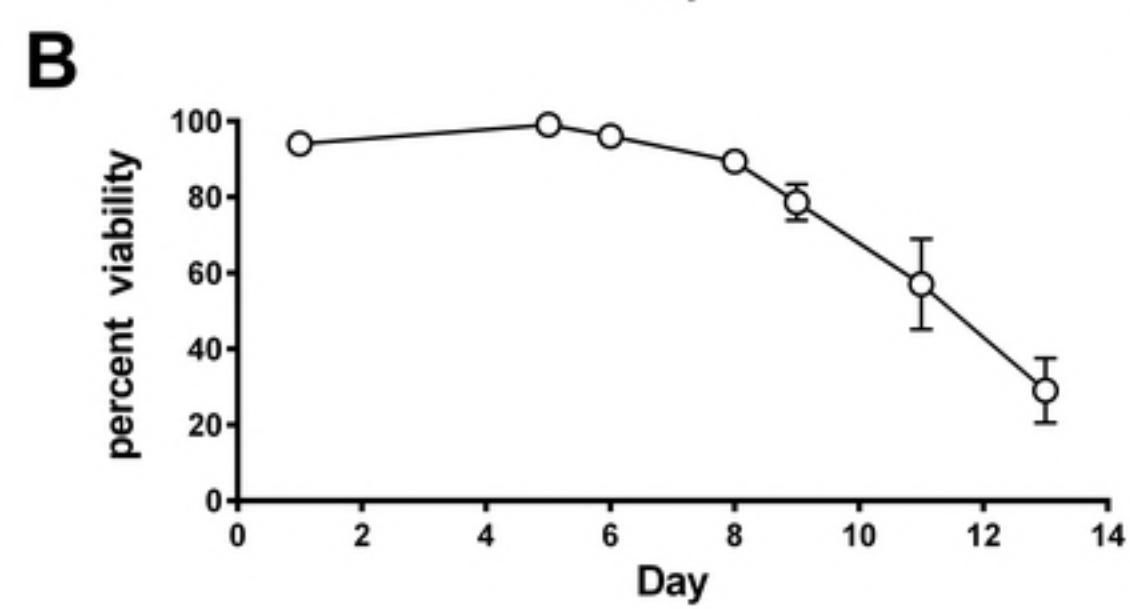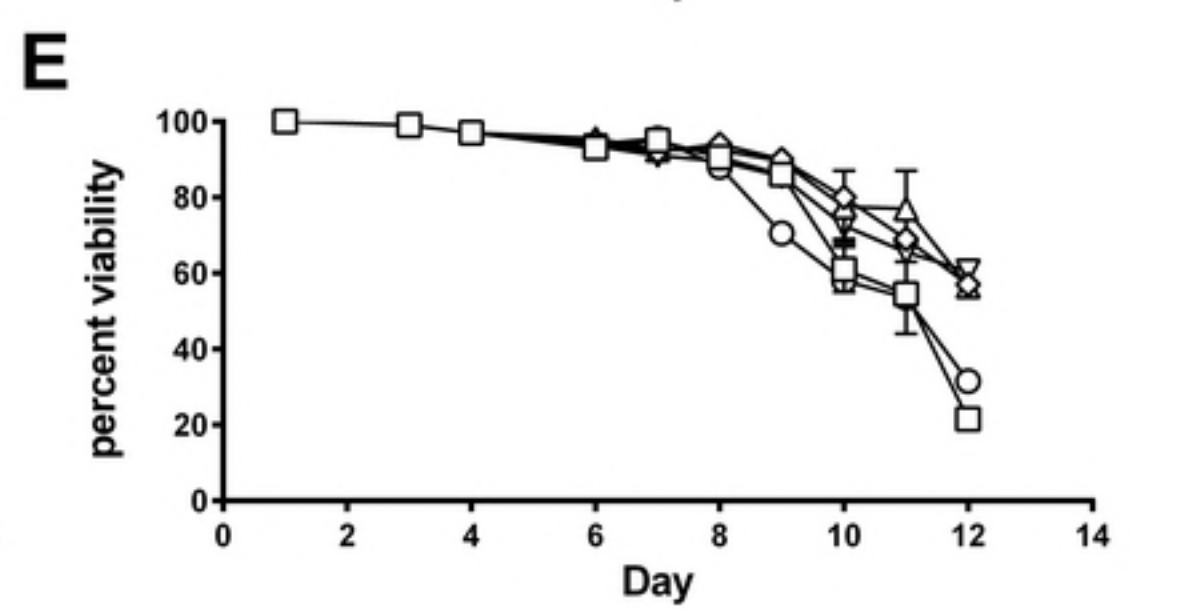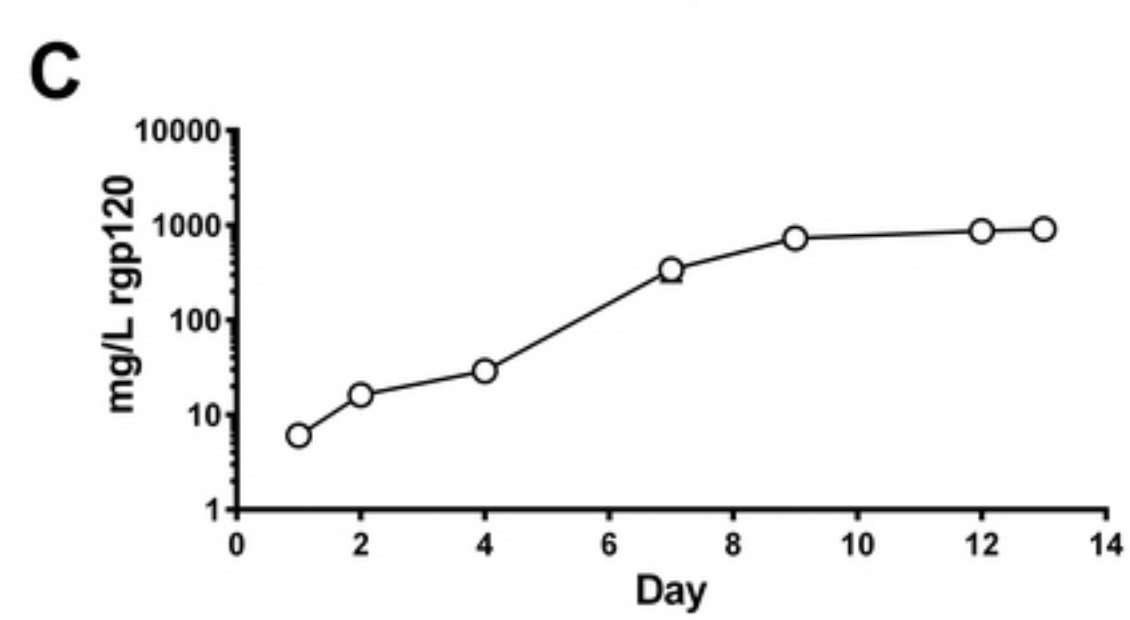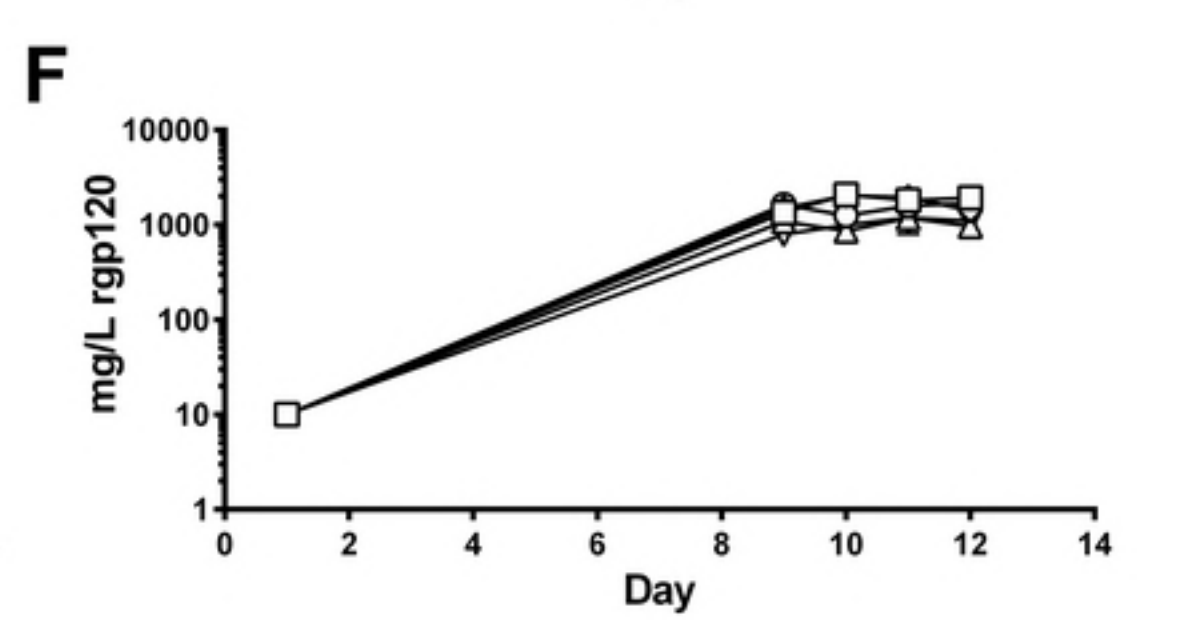

□ cottonseed      △ wheat      ○ yeastolate  
 ◇ pea              ▽ CD-hydroysate



# PNGase F Digestion

# EndoH Digestion

CHO-S

MGAT1<sup>-</sup> (5F)

CHO-S

MGAT1<sup>-</sup> (5F)

A244\_N332

A244\_N332

A244\_N332

A244\_N332

+

-

+

-

+

-

+

-

kDa

260 -

160 -

110 -

80 -

60 -

50 -

40 -

30 -

20 -

— PNGase F

— EndoH

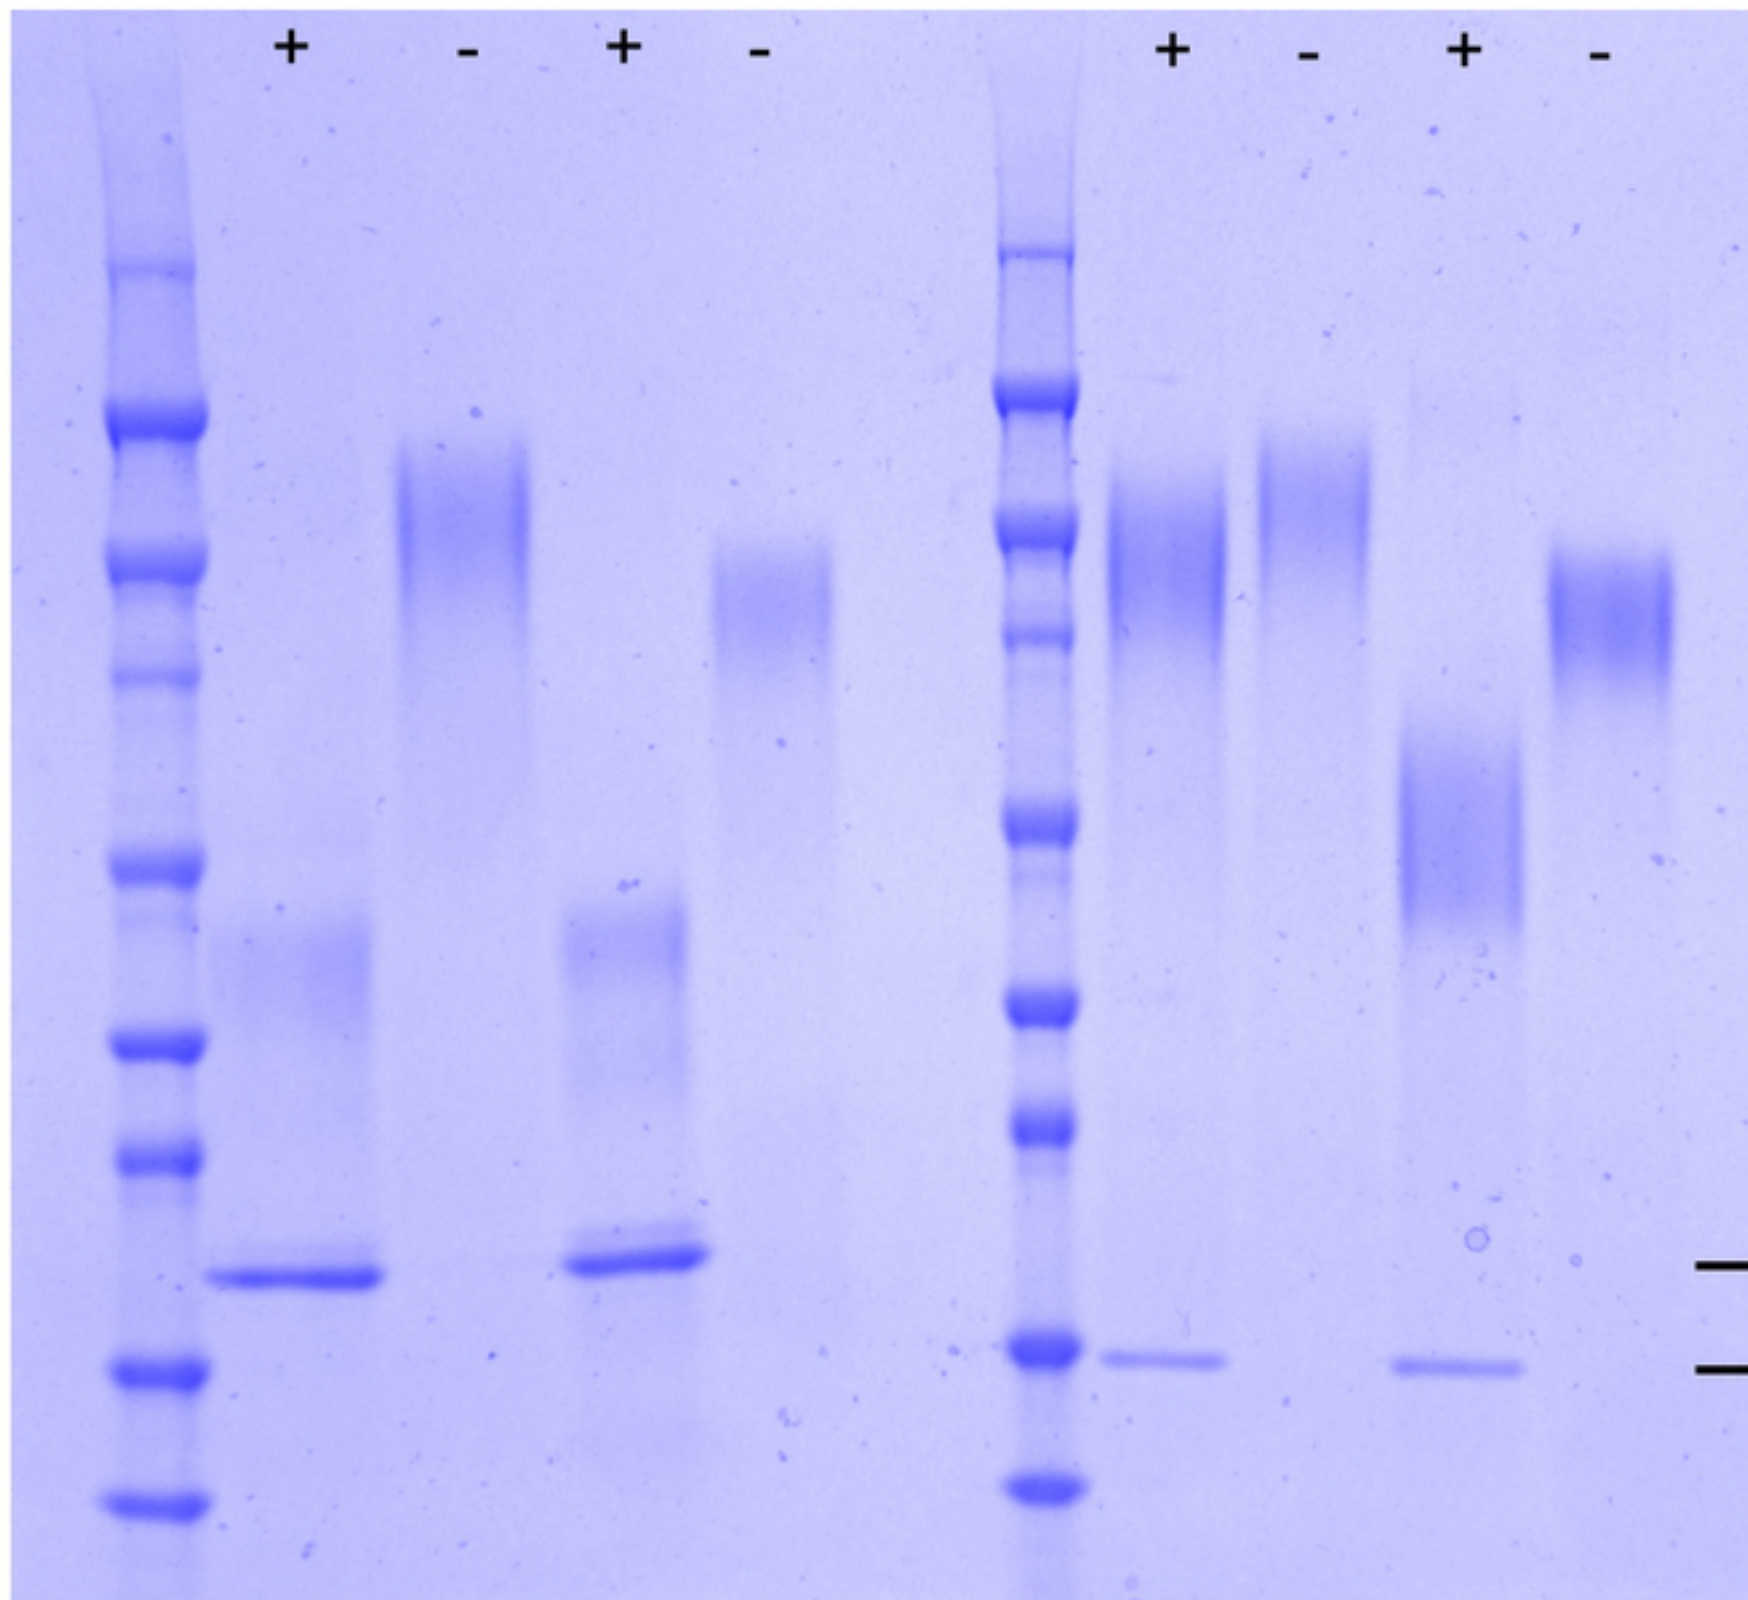

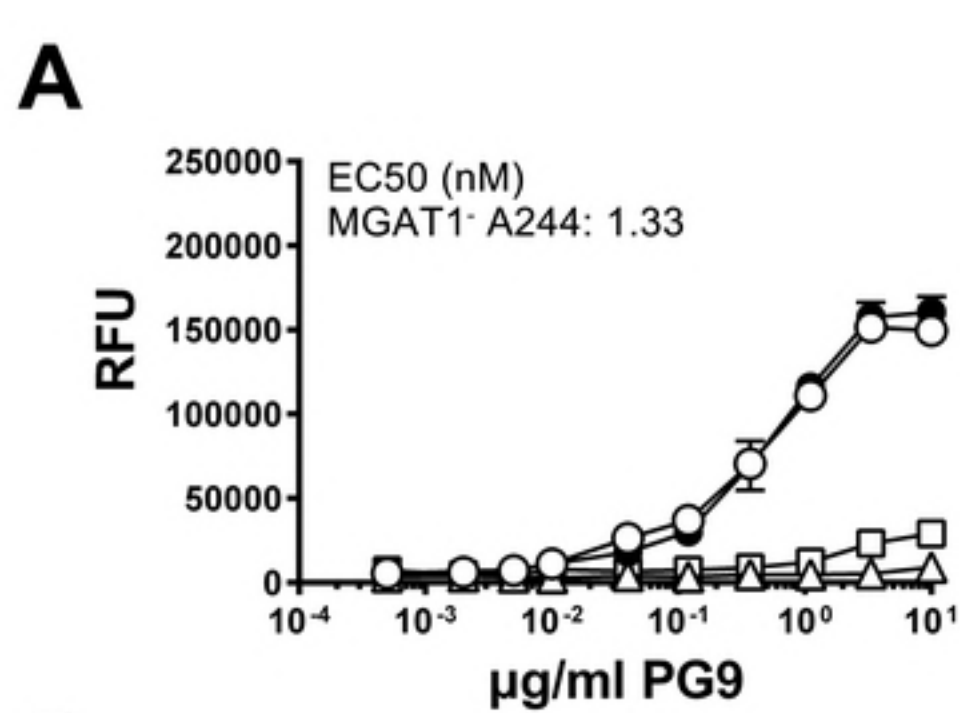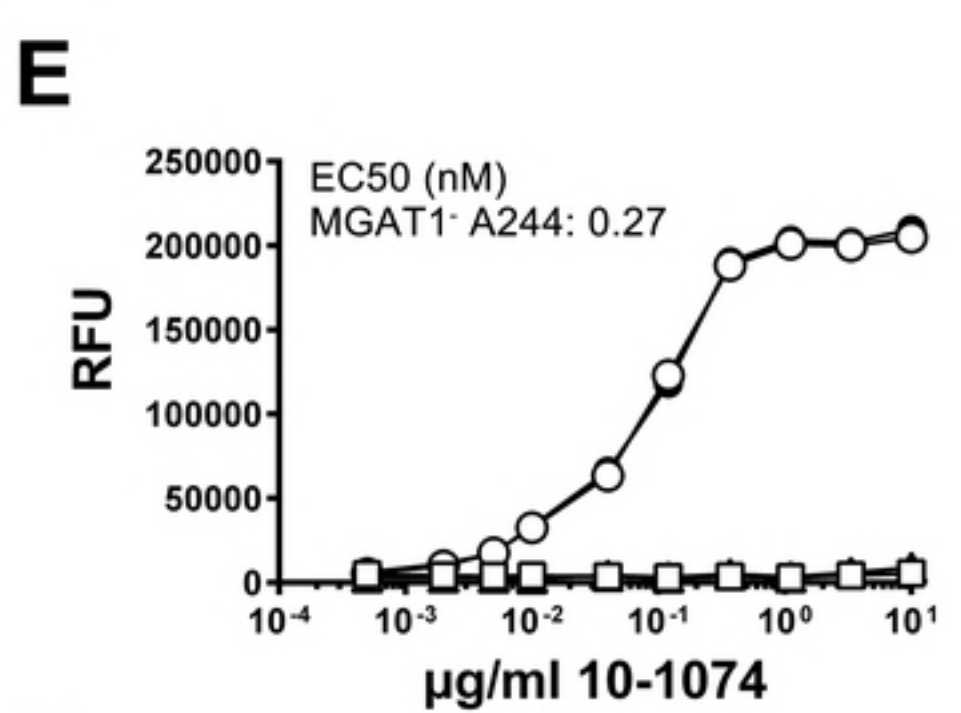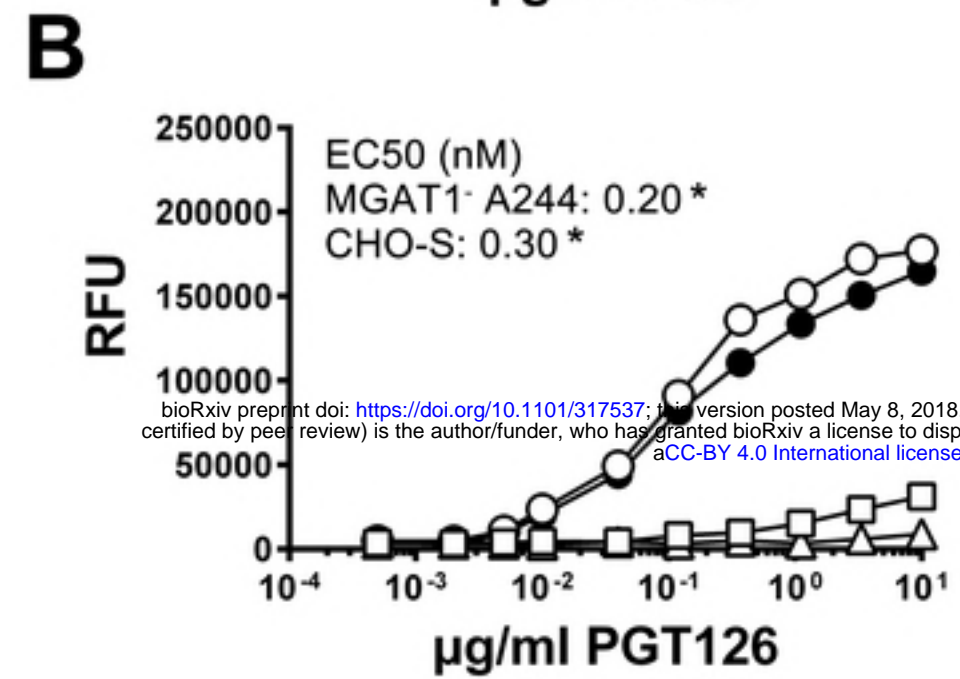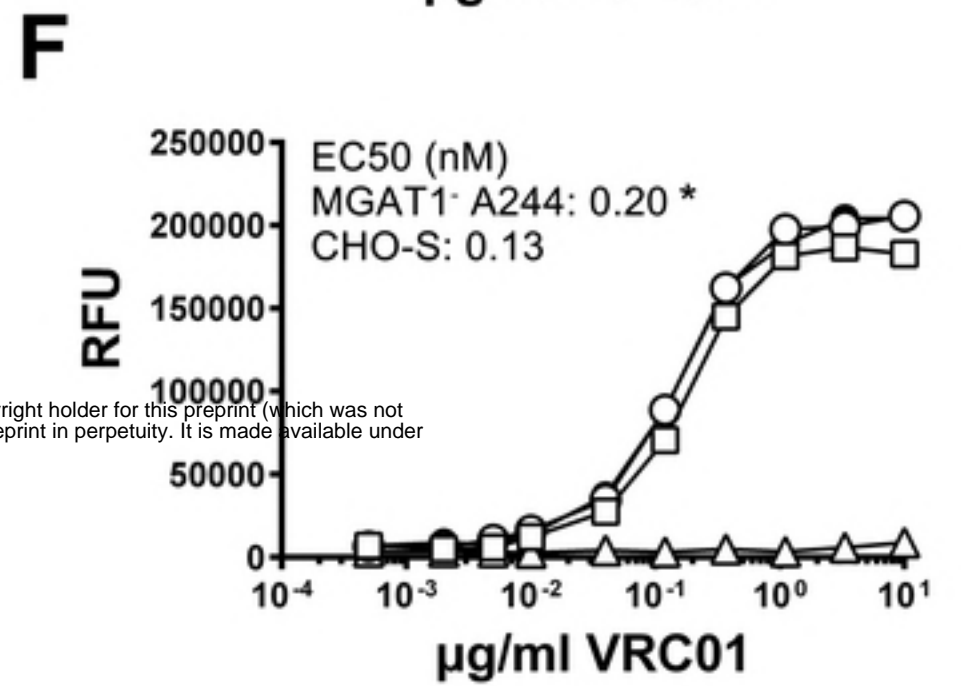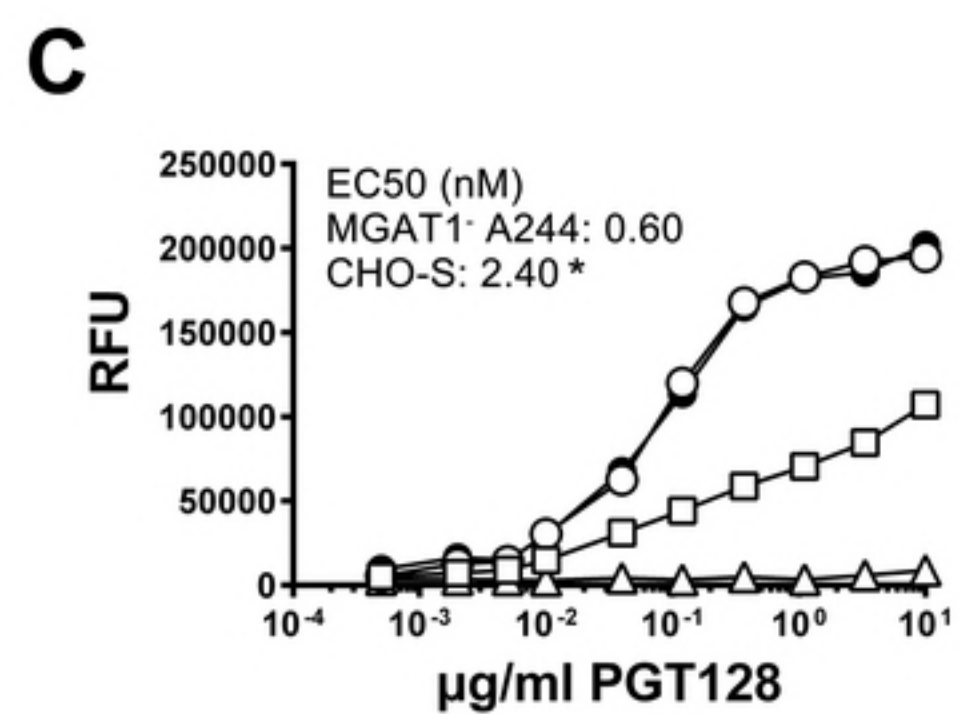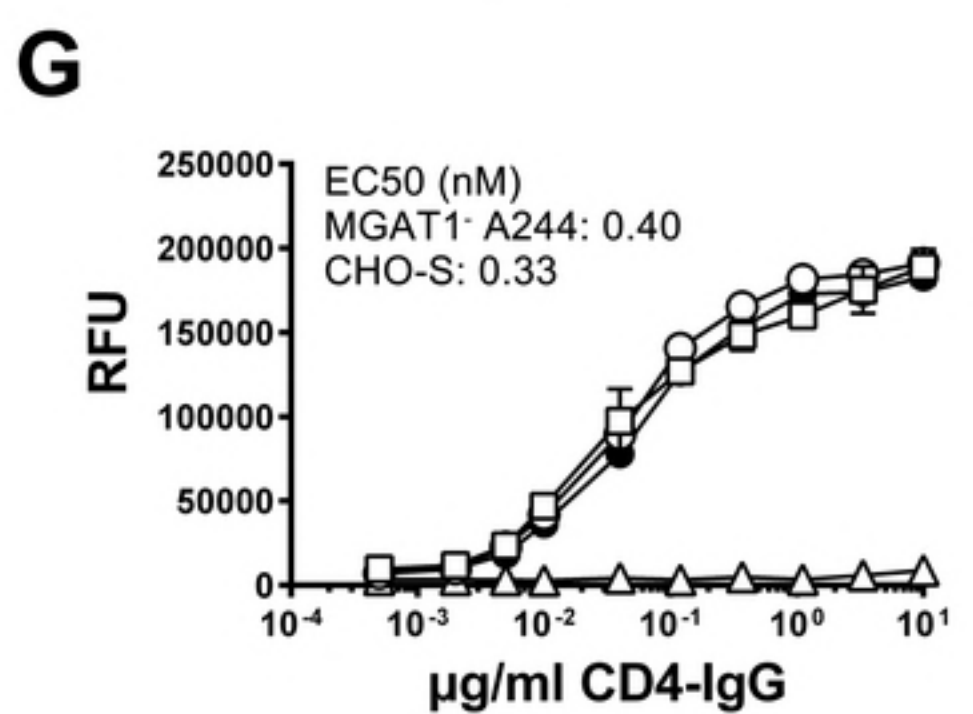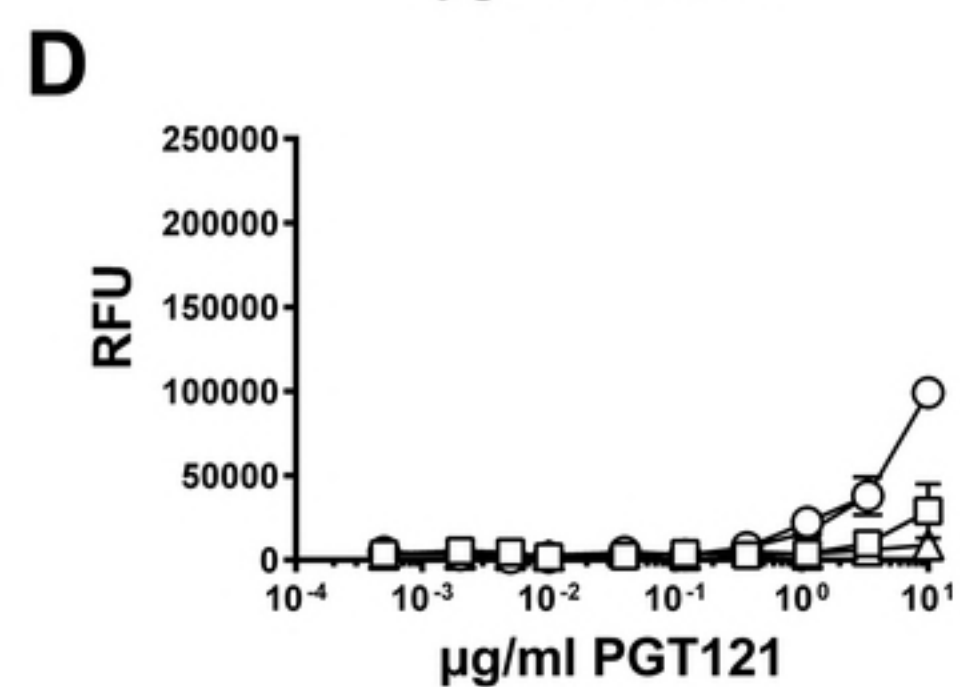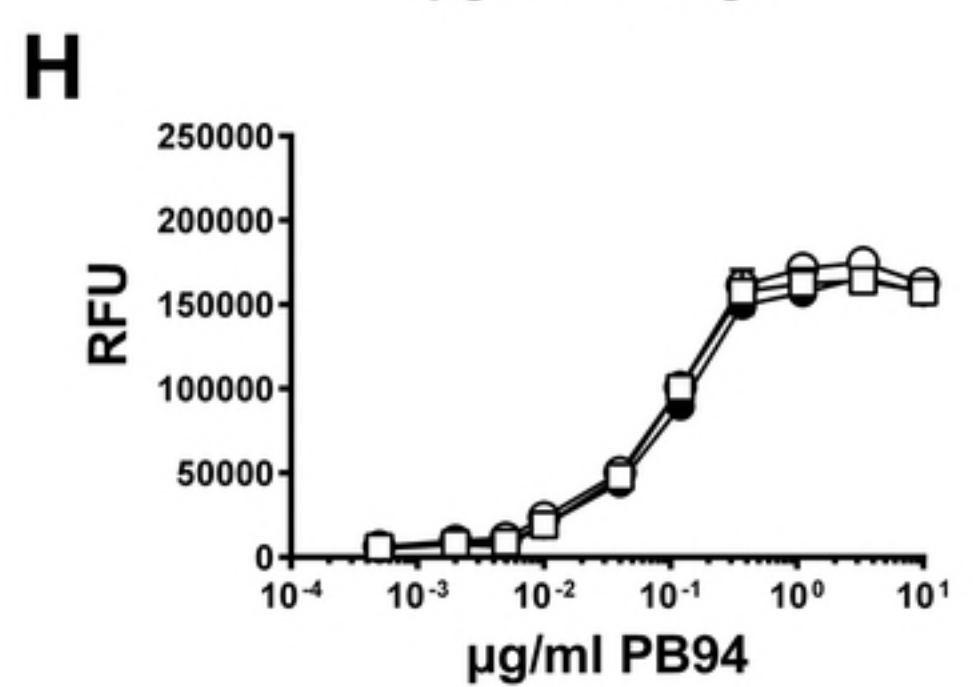

- A244\_N332-rgp120 produced in MGAT1- CHO cell line (clone 5F) stable
- A244\_N332-rgp120 produced in MGAT1- CHO cell line by transient transfection
- A244-gp120 produced in CHO-S cell line by transient transfection
- △ isotype control mAb
- \* no plateau

bioRxiv preprint doi: <https://doi.org/10.1101/317537>; this version posted May 8, 2018. The copyright holder for this preprint (which was not certified by peer review) is the author/funder, who has granted bioRxiv a license to display the preprint in perpetuity. It is made available under aCC-BY 4.0 International license.

DAY 1: Electroporate MGAT1- CHO cells with linearized plasmid

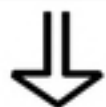

DAY 2: Plate cells with 500 µg/ml G418 and Alexa 488 polyclonal anti-gp120 (250,000 cells)

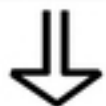

DAYS 14-16: Primary screening by ClonePix 2 (45,000 colonies), pick top 0.1% (44) into 96-well plate

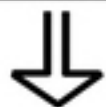

DAY 21: Secondary screening (43 colonies) ELISA

DAY 28: Continued screening and ELISA and Western Blot (15 colonies)

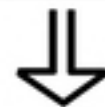

DAY 56: Scale up 6 clones and assay for protein production/characterization

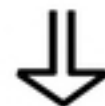

Stability study, culture optimization, sterility testing, single cell re-clone

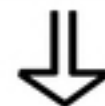

Master cell bank

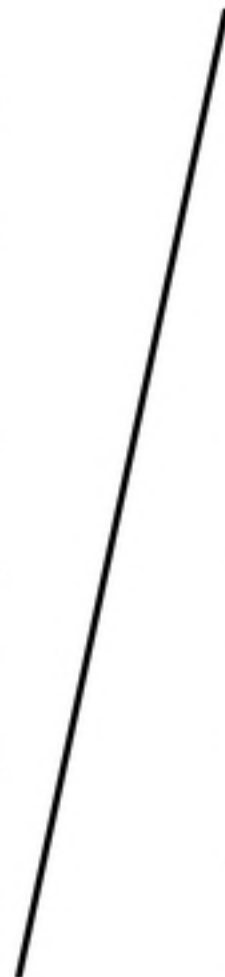

Source: http://biorxiv.org/content/10.1101/317537v1.full.pdf
